1           **The serogroup B meningococcal outer membrane vesicle-based**  
2           **vaccine 4CMenB induces cross-species protection against**  
3                           ***Neisseria gonorrhoeae***

4  
5 Isabelle Leduc<sup>1†</sup>, Kristie L. Connolly<sup>1†</sup>, Afrin Begum<sup>1</sup>, Knashka Underwood<sup>1</sup>, Nazia Rahman,  
6 Stephen Darnell<sup>1</sup>, Jacqueline T. Balthazar<sup>2</sup>, William M. Shafer<sup>2</sup>, Andrew N. Macintyre<sup>3</sup>, Gregory  
7 D. Sempowski<sup>3</sup>, and Ann E. Jerse<sup>1\*</sup>

8  
9  
10 <sup>1</sup>Department of Microbiology and Immunology, F. Edward Hèbert School of Medicine, Uniformed  
11 Services University, Bethesda, Maryland, United States of America

12  
13 <sup>2</sup>Department of Microbiology and Immunology and The Emory Antibiotic Resistance Center,  
14 Emory University School of Medicine, Atlanta, Georgia, United States of America

15  
16 <sup>3</sup>Duke Human Vaccine Institute, Duke University School of Medicine, Durham, North Carolina,  
17 United States of America

18  
19  
20 \*Corresponding author  
21 Email: [ann.jerse1@usuhs.edu](mailto:ann.jerse1@usuhs.edu) (AEJ)

22  
23  
24 †These authors contributed equally to the work.

25  
26  
27

## 28 **Abstract**

29

30           There is a pressing need for a gonorrhea vaccine due to the high disease burden  
31 associated with gonococcal infections globally and the rapid evolution of antibiotic resistance in  
32 *Neisseria gonorrhoeae* (*Ng*). Current gonorrhea vaccine research is in the stages of antigen  
33 discovery and the identification of protective immune responses, and no vaccine has been tested  
34 in clinical trials in over 30 years. Recently, however, it was reported in a retrospective case-control  
35 study that vaccination of humans with a serogroup B *Neisseria meningitidis* (*Nm*) outer membrane  
36 vesicle (OMV) vaccine (MeNZB) was associated with reduced rates of gonorrhea. Here we  
37 directly tested the hypothesis that *Nm* OMVs induce cross-protection against gonorrhea in a well-  
38 characterized female mouse model of *Ng* genital tract infection. We found that immunization with  
39 the licensed *Nm* OMV-based vaccine 4CMenB (Bexsero®) significantly accelerated clearance  
40 and reduced the *Ng* bacterial burden compared to administration of alum or PBS. High titers of  
41 serum IgG1 and IgG2a and vaginal IgG1 that cross-reacted with *Ng* OMVs were induced by  
42 vaccination via either the subcutaneous or intraperitoneal routes, and a 4-fold increase in the  
43 serum bactericidal<sub>50</sub> titers was detected against the challenge strain. Antibodies from vaccinated  
44 mice recognized several surface proteins in a diverse collection of *Ng* strains, including PilQ,  
45 BamA, MtrE, PorB, and Opa, and 4CMenB-induced antibodies bound PilQ and MtrE in native  
46 form on the surface of viable bacteria. In contrast, the antibodies were only cross-reactive against  
47 lipooligosaccharide species from a few *Ng* strains. Our findings directly support epidemiological  
48 evidence that *Nm* OMVs confer cross-species protection against *Ng* and implicate several *Ng*  
49 surface antigens as potentially protective targets. This work also validates the murine infection  
50 model as a relevant experimental system for investigating mechanisms of vaccine-mediated  
51 protection against gonorrhea.

52

## 53 **Author summary**

54

55           Over 78 million *Neisseria gonorrhoeae* (*Ng*) infections occur globally each year and control  
56 of gonorrhea through vaccination is challenged by a lack of strong evidence that immunity to  
57 gonorrhea is possible. This contention was recently challenged by epidemiological evidence  
58 suggesting that an outer membrane vesicle (OMV) vaccine from the related species *Neisseria*  
59 *meningitidis* (*Nm*) protected humans against gonorrhea. Here we provide experimental evidence  
60 in support of this hypothesis by demonstrating that a licensed, modified version of this *Nm* OMV-  
61 based vaccine accelerates clearance of *Ng* in a mouse infection model. These results confirm the  
62 possibility cross-species protection and are important in that they support the biological feasibility  
63 of vaccine-induced immunity against gonorrhea. We also showed that several *Ng* outer  
64 membrane proteins are recognized by antisera from vaccinated mice that may be protective  
65 targets of the vaccine. Additionally, our demonstration that a vaccine that may reduce the risk of  
66 gonorrhea in humans protects mice against *Ng*, a highly host-restricted pathogen, validates the  
67 mouse model as a potentially useful tool for examining mechanisms of protection, which could be  
68 exploited in the development of other candidate gonorrhea vaccines.

## 69 Introduction

70

71 An estimated 78 million new gonorrheal infections occur each year worldwide [1] and rates  
72 are rising globally, with a 67% increase in reported infections in the U.S. between 2014 and 2018  
73 [2]. Caused by the Gram-negative bacterium *Neisseria gonorrhoeae* (*Ng*), gonorrhea is  
74 associated with significant morbidity and mortality that disproportionately affects women and  
75 newborns. Ascending lower urogenital tract infection can occur in both sexes to cause epididymis,  
76 endometritis and salpingitis, but is more frequent in females. *Ng* pelvic inflammatory disease can  
77 be asymptomatic or acute, and is associated with ectopic pregnancy, infertility and chronic pelvic  
78 pain. Disseminated gonococcal infection can occur in either gender [3]. Transmission of  
79 gonorrhea to neonates from infected mothers can cause acute neonatal conjunctivitis [4] and  
80 there is a clear association between maternal gonorrhea, low-birth weight and pre-mature delivery  
81 [5]. The impact of gonorrhea on human health is amplified by its role in increasing both  
82 transmission and susceptibility to the human immunodeficiency virus (HIV) [6, 7].

83 Gonorrhea is classified as an urgent public health threat due to decreasing susceptibility  
84 to the last remaining reliable monotherapy for gonorrhea, the extended-spectrum cephalosporins.  
85 Dual therapy with high-dose ceftriaxone and azithromycin is currently recommended for empirical  
86 treatment of gonorrhea in many countries. However, *Ng* susceptibility to these antibiotics  
87 continues to decrease world-wide [8], and alarmingly, treatment failures due to strains that are  
88 resistant to these antibiotics have been reported [9, 10]. New antibiotics are under development  
89 [11, 12]; however, the call for a gonorrhea vaccine has been reinvigorated by the evolutionary  
90 success of the gonococcus in outrunning public health efforts to contain it through antibiotic  
91 therapy [13, 14].

92 Early vaccine research was challenged by the discovery that several *Ng* surface  
93 molecules are phase or antigenically variable. There was also no animal model other than  
94 chimpanzees for analyzing host responses and systematic testing of immunogens, and two

95 published clinical trials using a killed whole cell vaccine [15] or purified pili [16] were unsuccessful  
96 despite earlier small in-house studies that showed protection from urethral challenge in human  
97 male volunteers [17]. Since this time, several conserved and semi-conserved vaccine antigens  
98 that elicit bactericidal antibodies or inhibit target function have been identified, some of which  
99 show protection in a well-characterized mouse genital tract infection model [13]. How well the  
100 mouse model predicts vaccine efficacy in humans is not known, however, due to the strict host-  
101 specificity of *Ng* and a lack of information on correlates of immune protection in humans. There  
102 is little immunity to natural infection in humans and mice [18], and there is growing evidence that  
103 the adaptive response to *Ng* infection is suppressed. As recently reviewed by Lovett and Duncan  
104 [19], human humoral immune responses to *Ng* to infection are modest at best and the analysis  
105 thereof is complicated by pre-existing antibodies to carbohydrate and protein surface antigens  
106 that are induced by commensal *Neisseria sp.*, although antibodies to some antigens are increased  
107 by infection [20]. Human cellular responses to *Ng* infection are less well studied, but appear to be  
108 driven by a Th17 pro-inflammatory response. Th1 responses, in contrast, appear suppressed [20],  
109 and several pathways that result in reduced antigen presentation and, or inhibition of T cell  
110 responses to *Ng* have been identified using human immune cells and experimentally infected  
111 mice [21-25].

112         Recent epidemiological evidence, however, suggests immunity to gonorrhea can be  
113 achieved in humans through vaccination with outer membrane vesicles (OMVs) of the related  
114 species, *Neisseria meningitidis (Nm)*. In this cross-sectional study, vaccination of individuals with  
115 the serogroup B meningococcal vaccine MeNZB, which consisted of OMVs from an endemic New  
116 Zealand strain, was associated with a reduced rate of gonorrhea in adolescents and adults aged  
117 15-30 years old [26]. Using cases of chlamydia as a control, the estimated effectiveness of this  
118 meningococcal vaccine against gonorrhea was predicted to be 31%. These data are the first  
119 controlled evidence in humans in over 40 years that vaccine-induced protection against gonorrhea

120 is possible. A similar finding was suggested by epidemiological studies on *Nm* OMV vaccines in  
121 Cuba and Norway [27].

122 To directly test the hypothesis that *Nm* OMV-based vaccines induce cross-species  
123 protection against *Ng*, here we evaluated the *in vivo* efficacy of the licensed 4CMenB (“4  
124 Component Meningitis B”; Bexsero®) vaccine in a female mouse model of *Ng* lower genital tract  
125 infection. 4CMenB consists of *Nm* OMVs from the *Nm* strain used in the MenNZB vaccine and  
126 five recombinant *Nm* proteins [28], only one of which, the neisserial heparin-binding antigen  
127 (NHBP), is a feasible vaccine target for gonorrhea [29, 30]. Our results show that 4CMenB  
128 significantly reduces the *Ng* bioburden, accelerates clearance of infection, and induces antibodies  
129 that recognize several *Ng* proteins, at least three of which are promising vaccine targets. These  
130 findings are consistent with epidemiological data that suggest cross-species protection against  
131 gonorrhea is possible and validate the gonorrhea mouse model as a useful experimental system  
132 for studying vaccine-mediated correlates of protection against this human disease.

133

## 134 **Results**

135

### 136 **Optimization of the immunization regimen to induce serum and vaginal antibodies**

137 The recommended dosing regimen for 4CMenB in humans is two 500  $\mu$ L doses given  
138 intramuscularly, four weeks apart. As a preliminary step for mouse immunization/challenge  
139 studies, we immunized BALB/c mice with 20, 125, or 250  $\mu$ L of the 4CMenB vaccine on days 1  
140 and 28 by the subcutaneous (SC) or intraperitoneal (IP) routes to assess safety and  
141 immunogenicity. A dose-response in serum IgG1 titers against the 4CMenB vaccine components  
142 was detected by ELISA in IP- and SC-immunized mice (Fig S1A), and IgG2a titers were higher in  
143 mice given 100  $\mu$ L or 250  $\mu$ L compared to 20  $\mu$ L (Fig S1B). This dose response was mirrored in  
144 Western blots using anti-IgG secondary antibody against whole-cell lysates of *Nm* and six

145 different strains *Ng* (Fig S1C). Serum from control mice given PBS or Alum adjuvant alone did  
146 not recognize any *Nm* or *Ng* proteins. No adverse effects were observed following IP injection.  
147 Nodules formed at the injection site in SC-immunized mice for all doses given, which resolved  
148 over time.

149         The MenNZB human epidemiology study reported by Petousis-Harris, et al. [26] was  
150 based on subjects who received a 3-dose regimen separated by one month. Upon demonstrating  
151 that the 250  $\mu$ L dose of 4CMenB was well-tolerated and induced the highest serum antibody titers,  
152 we added a third immunization in subsequent mouse immunization/challenge experiments. Mice  
153 were given 250  $\mu$ L of the formulated vaccine three times by IP or SC injection; controls received  
154 Alum or PBS (IP). A 3-week interval between immunizations was used to avoid increasing the  
155 age of the mice before challenge, which can reduce susceptibility to *Ng*. Significantly higher titers  
156 of *Ng*-specific serum total Ig, IgG1, and IgG2a ( $p < 0.004$ ) but not IgA were detected in SC- and  
157 IP-immunized mice against *Ng* OMVs compared to control groups that received Alum or PBS on  
158 day 52 (Fig 1A-D). Total Ig, IgG1 and IgG2a titers were further elevated by the third immunization  
159 in both the IP- and SC-immunized groups (day 31 versus day 52) ( $p \leq 0.05$ ). The IgG1/IgG2a ratio  
160 was significantly lower for IP-immunized mice on day 31, but similar to SC-immunized mice on  
161 day 52 (Fig 1E) due to a marked increase in IgG2a titers in the SC-immunized group after the  
162 third immunization (Fig 1C). Vaginal total Ig and IgG1 ( $p < 0.0001$ ), but not IgG2a or IgA were  
163 significantly elevated in vaginal washes collected after the second immunization compared to  
164 control groups in IP-immunized mice, but not SC-immunized mice (Fig 1F-I). Vaginal washes  
165 were not collected after the third immunization to avoid altering the vaginal microenvironment  
166 before bacterial challenge and cessation of the LeBoot effect, which would increase the number  
167 of mice in the undesired stages of the estrous cycle at the time of challenge [31]. We conclude  
168 that a half human-dose of 4CMenB is well-tolerated in mice and that a dosing regimen similar to  
169 that used in the New Zealand study elicits systemic and mucosal humoral immune responses that  
170 are cross-reactive against *Ng*.

171  
172 **4CMenB-immunized mice clear *Ng* infection significantly faster and have a reduced**  
173 **bioburden following vaginal challenge**

174 To assess the protective efficacy of 4CMenB against *Ng*, we challenged 4CMenB-  
175 immunized and control mice with *Ng* strain F62 three weeks after the third immunization and  
176 quantitatively cultured vaginal swabs for *Ng* over seven days. In combined data from two  
177 independent experiments, IP-immunized mice exhibited a significantly faster clearance rate ( $p$   
178  $\leq 0.0001$ ) (Fig 2A) and lower bioburden compared to control groups given PBS or Alum alone ( $p$   
179  $< 0.05$  and  $\leq 0.01$ , respectively) (Fig 2B and 2C). Data for each individual experiment, which also  
180 showed significantly faster clearance for both immunized groups compared to control mice, are  
181 shown in Fig S2A and S2C. The bioburden in the IP-immunized group was significantly lower than  
182 that of the Alum only group in both experiments, while the difference in the bioburden in SC-  
183 immunized mice compared to Alum was significant only in the repeat experiment ( $p < 0.0001$ )  
184 (Fig S2B and S2D). Combined data from the two experiments showed that 70% and 88% of mice  
185 given 4CMenB by the SC and IP routes, respectively, cleared infection by day 7 compared to 25-  
186 30% of mice given alum or PBS (Fig 2D).

187 A peak vaginal PMN influx beginning on day 4 post-bacterial challenge was observed in  
188 all groups, and there was no difference in percentage of PMNs among experimental groups over  
189 time (Fig 3S). We also evaluated complement-dependent bactericidal activity of pooled sera from  
190 each group against *Ng* strain F62, the serum-sensitive challenge strain, and against the serum-  
191 resistant strain FA1090, using normal human serum as the complement source. The bactericidal<sub>50</sub>  
192 titers were 1:480 and 1:240, respectively, which were 4-fold greater than that of pooled serum  
193 from the unimmunized group (Fig 3). We conclude that 4CMenB reproducibly accelerates  
194 clearance of *Ng* from the murine genital tract and lowers the bioburden over time and that  
195 opsonophagocytosis and complement-mediated bacteriolysis maybe contribute to the protection.



196

197 **4CMenB-Induced serum and vaginal antibodies cross-react with several *Ng* OMV**  
198 **proteins but not with *Ng* LOS species in a majority of strains**

199 To examine the cross-reactivity of 4CMenB-induced antibodies against *Ng* surface  
200 proteins, we conducted western immunoblots against OMVs from the challenge strain and five  
201 other *Ng* strains that are geographically and temporally distinct in their isolation. Pooled antisera  
202 from mice immunized twice with the 250  $\mu$ L dose by either the IP or SC routes (250IP or 250SC,  
203 respectively) recognized four prominent bands in fractionated OMV preparations all six strains: a  
204 high molecular weight (HMW) band > 220 kD, a doublet with bands of apparent molecular weight  
205 of 97 and 94 kDa, and a 55 kDa band (Fig 4). Several low intensity bands between 26 and 36  
206 kDa were also recognized in several of the strains. Reactivity of the 250SC antiserum was weaker  
207 than the 250IP antiserum, which likely reflects the lower titers of this antiserum. Serum from PBS-  
208 or Alum-treated control mice did not recognize any *Ng* proteins (data not shown). Consistent with  
209 ELISA data, serum reactivity as assessed by band intensity was increased by a third immunization  
210 (Fig 4A), and additional bands were recognized including several bands in the 30-35 kDa range.  
211 A similar recognition pattern was observed on blots incubated with pooled vaginal washes and  
212 sera collected 10 days after the third immunization from immunized but unchallenged mice  
213 followed by anti-mouse IgG or anti-mouse IgA (Fig. 4B; compare lanes 1 and 2 with lane 5 in  
214 each blot). These results also show that while vaginal titers were low after the second  
215 immunization as measured by ELISA (Fig 1), vaccine-induced vaginal antibodies were readily  
216 detectable by immunoblot after a third immunization.

217 We also examined the reactivity of the immune serum against *Ng* lipooligosaccharide  
218 (LOS) based on the report that a significant percentage of the bactericidal activity induced by an  
219 *Nm* OMV vaccine was directed towards *Nm* LOS [32]. Neisserial LOS is a branched structure that  
220 consists of oligosaccharide extensions from the core oligosaccharide called the  $\alpha$ - and  $\beta$ -chains.

221 An additional extension called the  $\gamma$ -chain is present in some strains [33]. Different LOS species  
222 can be produced within a strain due to phase variable expression of the glycosyltransferase genes  
223 *IgtA*, *IgtC*, *IgtD* and *IgtG*, which results in different lengths of the oligosaccharide chains [34, 35].  
224 To test the cross-reactivity of 4CMenB antisera against *Ng* LOS, we fractionated crude LOS  
225 extracts by gel electrophoresis from four laboratory and thirteen clinical *Ng* isolates isolated  
226 between 1991 and 2019. Gels were stained or electroblotted to filters and incubated with  
227 monoclonal antibodies (3F11, 4C4 and 2C7) that recognize known epitopes within *Ng* LOS [36],  
228 or with the 4CMenB antiserum. All of the strains produced an LOS that bound one or more of  
229 monoclonal antibodies (Fig 5A). In contrast, the 4CMenB antiserum did not recognize the LOS in  
230 thirteen of the seventeen strains tested. The remaining four strains (MS11 and three clinical  
231 isolates LGB24, NMCS322 and NMCS6364) produced one or two LOS species that cross-  
232 reacted with the 4CMenB antiserum (Fig 5B). The lack of recognition of LOS in some strains could  
233 potentially be explained by the reactive LOS epitope being phase variable. Schneider *et al.* [37]  
234 demonstrated that long-chain LOS species are selected during urethral infection in men and Rice  
235 and colleagues have shown that the phase variable 2C7 LOS epitope is expressed among a  
236 majority of clinical isolates [36]. Therefore, to test investigate whether the anti-4CMenB-reactive  
237 LOS epitope is perhaps phase variable and selected *in vivo*, we infected mice with strain H041.  
238 No 4CMenB-reactive LOS species were detected in LOS preps from pooled vaginal H041 isolates  
239 cultured on days 2 and 5 post-inoculation (Fig 5C). We conclude that while cross-reactive  
240 antibodies to *Ng* LOS epitopes are induced by 4CMenB, the epitopes do not appear to be shared  
241 by a majority of *Ng* strains.

242

#### 243 **4CMenB induces antibodies against promising *Ng* vaccine targets**

244 To identify the proteins recognized by 4CMenB-induced antisera, we fractionated OMVs  
245 from *Ng* strain F62 on two separate gels. One was stained with a G-250 Coomassie stain for

246 mass spectrometry analysis, while the other was used for Western blotting with the 250IP  
 247 antiserum. The blot and gel were aligned and the reactive bands identified by molecular weight  
 248 and band intensity. Bands indicated by the numbered arrows (Fig 6A), which correspond to the  
 249 most intensely recognized bands in the Western blot (Fig. 6B), were submitted for mass  
 250 spectrometry analysis (Table 1). The HMW band at the top of the gel was identified as PilQ,  
 251 which is a protein that forms a dodecamer through which gonococcal pili extend [38]. Mass  
 252 spectrometry analysis identified two potential proteins in band 2 (97 kDa): an elongation factor  
 253 and a phosphoenolpyruvate. Band 3 (94 kDa) also contained 2 potential proteins: BamA, an  
 254 Omp85 homologue involved in the biogenesis of OM proteins (OMPs) [39], and a  
 255 methyltransferase. Band 4 (55 kDa) was identified as MtrE, the OM channel of the three different  
 256 gonococcal active efflux pump systems [40]. The 36 kDa protein (band 5) was identified as PorB,  
 257 and the 32 kDa band (band 6), as Opa. In summary, we identified eight proteins from six cross-  
 258 reactive bands, five of which are known surface-exposed *Ng* antigens.

259

260 **Table 1. Identification of protein bands recognized by 4CMenB antisera as determined by**  
 261 **mass spectrometry**

| Sample<br>(band) | Protein name                                                          | Database<br>Accession<br>ID <sup>a</sup> | MW<br>(Da) | Peptide<br>Count <sup>b</sup> | MS &<br>MS/MS<br>Score <sup>c</sup> | Peptide<br>sequenced<br>ion score <sup>d</sup> | Scoring<br>Threshold <sup>e</sup> |
|------------------|-----------------------------------------------------------------------|------------------------------------------|------------|-------------------------------|-------------------------------------|------------------------------------------------|-----------------------------------|
| 1                | Type IV pilus biogenesis and competence protein PilQ                  | Q5FAD2                                   | 77903      | 9                             | 556                                 | 482                                            | 55                                |
| 2                | Elongation factor G                                                   | B4RQX2                                   | 77124      | 12                            | 852                                 | 722                                            | 55                                |
| 2                | Phosphoenolpyruvate synthase                                          | KLS49216                                 | 87167      | 10                            | 666                                 | 557                                            | 55                                |
| 3                | Outer membrane protein assembly factor BamA                           | Q5F5W8                                   | 87888      | 16                            | 617                                 | 481                                            | 55                                |
| 3                | 5-methyltetrahydropteroyltriglutamate--homocysteine methyltransferase | Q5F863                                   | 85030      | 6                             | 227                                 | 204                                            | 55                                |
| 4                | Multidrug transporter MtrE                                            | Q5F726                                   | 50382      | 10                            | 452                                 | 317                                            | 55                                |
| 5                | Porin (PorB)                                                          | YP_208842                                | 35516      | 16                            | 969                                 | 814                                            | 55                                |
| 6                | Pil/Opa                                                               | Q51014                                   | 31429      | 10                            | 670                                 | 568                                            | 55                                |

262

263 <sup>a</sup>For the protein sequence, search this ID at "http://www.ncbi.nlm.nih.gov", under the parameter  
264 to "Protein"; <sup>b</sup>Number of observed peptides matching the theoretical digest of the identified  
265 protein; <sup>c</sup>Combined score of the quality of the peptide-mass fingerprint match and MS/MS peptide  
266 fragment ion matches (if MS/MS data was generated); <sup>d</sup>Score of the quality of MS/MS peptide  
267 fragment ion matches only (if MS/MS data was generated); <sup>e</sup>Significant score threshold. A hit with  
268 an "MS & MS/MS score" or an "Ion score" above this value is considered a significant  
269 identification.  $p < 0.05$  for the given species database. Only database search hits with "MS and  
270 MSMS scores" above this value are reported.

271  
272 **4CMenB-induced antibodies bind native PilQ and MtrE on the surface of viable**  
273 **gonococci**

274 We next performed immunoprecipitations using 4CMenB-induced mouse antisera and live  
275 FA1090 and MS11 bacteria. Antigen-antibody complexes were solubilized in detergent, retrieved  
276 using protein A/G agarose, and subjected to non-denaturing Western blotting with the 250IP  
277 antiserum. Whole cell lysates and OMVs were run in parallel and exhibited the same reactive  
278 band pattern shown in Figs 4A and 6B. Serum from the alum-alone group pulled down non-  
279 specific proteins smaller than 30 kDa that did not align with bands in lanes containing whole cell  
280 lysates or OMVs. In contrast, the 250IP antiserum pulled down two proteins from both strains: a  
281 HMW protein, possibly PilQ, and a ~ 55 kDa protein (Fig 7). We hypothesized the 55 kD protein  
282 was MtrE based on the greater intensity of this band in western blots against OMVs from strains  
283 MS11, H041 and F89, which carry one or more *mtr* mutations that cause increased production of  
284 the MtrCDE efflux pump (Fig 4A).

285 To confirm that the two identified proteins are PilQ and MtrE, we included single isogenic  
286 mutants that lack expression of either protein, and the results confirmed the identity of the two  
287 immunoprecipitated proteins as PilQ and MtrE. The HMW band but not the 55-kDa protein was

288 absent from the sample in which mutant strain FA1090*pilQ* was incubated with the antisera.  
289 Inversely, immunoprecipitation with mutant MS11*mtrE*- did not yield a band around 55 kDa, but  
290 did retain binding to the HMW protein PilQ. We conclude that 4CMenB induces antibodies  
291 recognize the native conformation of *Ng* PilQ and MtrE on the gonococcal surface.

292

## 293 **Discussion**

294

295 The pathogenic *Neisseria* are human-specific pathogens that differ in the capacity to  
296 cause life-threatening septicemia and meningitis (*Nm*) and nonulcerative sexually transmitted  
297 infections of the urogenital tract that can ascend to cause damage to the upper reproductive tract  
298 (*Ng*). The only reservoir for these pathogens is human pharyngeal, genital and rectal mucosae  
299 where the bacteria reside extracellularly and within an intracellular niche [41, 42]. *Nm*, unlike *Ng*,  
300 produces a complex polysaccharide capsule that is critical for invasive disease, and vaccines that  
301 target the capsules of four of the five most prevalent capsular serogroups A, C, W135 and Y have  
302 been effectively used for decades. This approach is not successful against serogroup B *Nm* due  
303 to the  $\alpha$ 2-8-linked polysialic acid composition of the serogroup B capsule, which mimics  $\alpha$ 2-8-  
304 sialylated human glycoproteins [43]. A recent advance in biomedical research was the  
305 development of two licensed vaccines that prevent serogroup B *Nm* invasive disease, one  
306 consisting of purified lipoprotein subunits, rLP2086 (Trumenba®, Pfizer), and the other, 4CMenB  
307 (Bexsero®, GSK) [43]. The 4CMenB vaccine was preceded by *Nm* OMV vaccines that were  
308 tailor-made against endemic serogroup B strains in New Zealand, Brazil, Cuba and Norway [27,  
309 43].

310 Like vaccine development for serogroup B *Nm*, gonorrhea vaccine research has focused  
311 on conserved outer membrane proteins, *Ng* outer membrane vesicles, and in one case, the 2C7  
312 oligosaccharide epitope within *Ng* LOS [18]. Vaccine development for gonorrhea is more  
313 complicated, however, by a lack of defined immune correlates of protection. Meningococcal

314 vaccine development is guided by serum bactericidal activity, which was first demonstrated as  
315 the main correlate of protection against *Nm* invasive disease in a classic case-control study at  
316 Fort Ord, California in the 1960s [44]. Natural history studies for gonorrhea, in contrast, have led  
317 only to an association between antibodies against the restriction modifiable protein (Rmp) and  
318 increased susceptibility to infection, and in high-risk women, antibodies to porin and Opa proteins  
319 as being associated with reduced risk of *Ng* upper reproductive tract infection [18]. The lack of  
320 clear correlates of protection and the absence of immunity to reinfection have challenged the  
321 possibility of a gonorrhea vaccine.

322         It is in this context that the reported reduced risk of gonorrhea in subjects immunized with  
323 an *Nm* OMV vaccine [26] may herald a breakthrough for gonorrhea vaccine development. In  
324 support of this epidemiological evidence, we demonstrated that 4CMenB reproducibly  
325 accelerated *Ng* clearance and lowered the bioburden of *Ng* in a well-characterized mouse model  
326 of genital tract infection. 4CMenB induced vaginal and serum IgG1, IgG2a and IgA when  
327 administered subcutaneously that cross-react with several *Ng* OMV proteins expressed by six  
328 different *Ng* strains. The dosing regimen we used was similar to that of the MenNZB vaccine given  
329 to the subjects in the retrospective case-control epidemiological study [26]. These data are direct  
330 evidence of cross-species protection and suggest female mice may reproduce vaccine-induced  
331 mechanisms that protect humans against gonorrhea.

332         Known host-restrictions that limit the capacity of mice to mimic human neisserial infections  
333 have been extensively reviewed [18]. Restricted factors include receptors for several neisserial  
334 colonization or invasion ligands that mediate adherence to and, or uptake by human cells,  
335 including the type IV pili, the Opa proteins, and in *Ng*, the pili/PorB/C3b complex. In experimental  
336 murine infection, *Ng* is seen adherent to vaginal epithelial cells, in cervical tissue and within the  
337 lamina propria, which is presumably mediated by other *Ng* colonization ligands for which species  
338 specificity has not been defined [45, 46] or that are not host-restricted [47]. Acquisition of iron  
339 from lactoferrin (LF) and transferrin (TF), and recently, zinc from calprotectin [48], is also host-

340 restricted. These restrictions limit the ability to fully evaluate the efficacy of vaccines that induce  
341 antibodies that block colonization or nutrient uptake in the mouse model, although mice that are  
342 transgenic for the human carcinoembryonic antigen cellular adherence molecules (CEACAMs),  
343 the major Opa protein receptors and hTF could be used [49-51]. Restrictions in soluble negative  
344 regulators of the complement cascade, factor H (fH) and C4b-binding protein (C4BP), also exist  
345 and are especially important to consider when testing vaccines that clear *Ng* infection through  
346 bactericidal and opsonophagocytic activity. Transgenic hFH and hC4BP mice made for this  
347 purpose and not used in our study, were recently utilized by Rice and colleagues to more  
348 rigorously test the *in vivo* efficacy of immunotherapeutic strategies against *Ng* [52].

349 While unable to fully mimic human neisserial infections, animal models provide a  
350 physiologically relevant and immunologically intact system for testing vaccine-induced immune  
351 responses against infection. Meningococcal vaccine development is aided by the use of mice or  
352 rabbits to test whether candidate vaccines induce bactericidal antibodies against *Nm* or cause  
353 adverse effects [53, 54], and improved mouse and infant rat bacteremia models have been used  
354 to measure the efficacy of candidate *Nm* vaccines in eliminating *Nm* from the bloodstream [50,  
355 55, 56]. Early gonorrhea vaccine studies used chimpanzees, which do not have all the host  
356 restrictions found in other animal species, and human male subjects [18]. Chimpanzees are no  
357 longer used for gonorrhea research, however a human urethritis model is still available [57] and  
358 is the most relevant model for studying vaccine efficacy against *Ng* urethral infection.

359 Currently, the estradiol-treated mouse model is the only animal model for studying  
360 gonorrhea vaccine efficacy in females, where the majority of morbidity and mortality associated  
361 with gonorrhea occurs. This model is also used to systematically screen antigens, immunization  
362 regimens, and adjuvants, and to analyze host responses [18]. Similarities between human and  
363 experimental murine infection include the fact that mice, like humans, produce a transient and  
364 unremarkable humoral response to *Ng* infection and can be reinfected with the same strain. *Ng*  
365 induces the Th17 pathway in both humans [19, 20] and mice [58, 59], which leads to recruitment

366 of PMNs to the infection site. Similar to that reported for human cervical infections, hormonally  
367 driven, cyclical fluctuations in *Ng* colonization load and selection for Opa protein phase variants  
368 occurs over the course of murine infection [60]. *Ng* is seen within murine PMNs and importantly,  
369 *Ng* mutants that are more or less susceptible to killing by human PMNs or cationic antimicrobial  
370 peptides *in vitro* have a similar phenotype when tested against murine PMNs and cathelicidins,  
371 and are more fit or attenuated compared to the wild-type strain, respectively, during murine  
372 infection [60, 61].

373 We also showed that the 4CMenB vaccine induced serum bactericidal activity and high  
374 titers of serum IgG1 and IgG2a that cross-reacted with *Ng* OMVs. Vaccine-induced vaginal IgA  
375 was readily detected by immunoblot. Recruitment of PMNs to the infection site occurred in all  
376 groups, which could enable opsonophagocytic killing of *Ng* in the presence of specific antibody.  
377 Serum bactericidal activity was also detected that could mediate protection through complement-  
378 mediated bacteriolysis. Detailed investigation of the mechanism of protection have thus far only  
379 been reported for one candidate *Ng* OMV vaccine [62] and the 2C7 vaccine [36], both of which  
380 induced Th1 responses and bactericidal antibodies. The demonstration by Russell and colleagues  
381 that a vaginally applied Th1-inducing cytokine adjuvant clears *Ng* infection in mice and induces a  
382 specific adaptive response and memory humoral response also suggests Th1 responses are  
383 protective [63]. Whether this is true for human infection is not known. The importance of  
384 bactericidal activity in clearing *Ng* mucosal infections, is also not known and may be vaccine-  
385 specific. Passive protection studies with bactericidal monoclonal antibody against the 2C7 epitope  
386 clearly showed antibodies were sufficient for vaccine-mediated clearance [36]; however, eleven  
387 other promising purified protein subunit vaccines that induced high-titered bactericidal activity  
388 against *Ng* have been tested by our laboratory over the years that did not show protective efficacy  
389 in the gonorrhea mouse model (A.E. Jerse, unpublished data in collaboration with others). Further  
390 investigation of the immune responses induced by 4CMenB in mice and vaccinated humans  
391 should define mechanisms of vaccine-mediated protection. The use of 4CMenB as a



392 commercially available positive control will also strengthen the protocol for screening of candidate  
393 gonorrhoea vaccine antigens in the mouse model.

394         Recently, the proteome of the 4CMenB vaccine was defined and shown to contain 461  
395 proteins, of which 60 proteins were predicted to be inner membrane or periplasmic and 36 were  
396 predicted to be in the outer membrane or extracellular [64]. Others identified twenty-two *Nm*  
397 proteins as comprising >90% of the 4CMenB proteome, twenty of which have homologs in *Ng*,  
398 These investigators also showed that post-vaccinated serum from 4CMenB-immunized humans  
399 recognized several bands in fractionated *Ng* OMVs by immunoblot [30]. In our study, the  
400 4CMenB-induced antisera recognized several denatured OMV proteins in a panel of diverse *Ng*  
401 strains, which is consistent with the OMV portion of the 4CMenB vaccine generating a robust  
402 cross-reactive response. Using mass spectrometry, we identified eight cross-reactive proteins,  
403 including MtrE, PilQ and BamA, which are promising vaccine candidates [18]. Recognition of LOS  
404 species was less consistent, with only ca 25% of strains expressing LOS species that were  
405 reactive with anti-4CMenB serum. We also demonstrated that 4CMenB-induced antibodies bound  
406 native PilQ and MtrE at the surface of viable *Ng*.

407         The 94% amino acid identity (S1 Table) between the *Nm* and *Ng* homologs identified in  
408 this report is consistent with the cross-reactivity that we observed. Importantly, the residues  
409 encompassing the two short surface-exposed loops of the MtrE monomer (residues 92-99 and  
410 299-311 [65]), which are highly conserved among *Ng* strains, are identical to those from MtrE  
411 expressed by *Nm* strain MC58 (data not shown). MtrE is the outer membrane channel of the  
412 MtrCDE, FarABMtrE and MacABMtrE efflux pumps, which expel antibiotics and host-derived  
413 antimicrobial compounds [66]. The importance of the MtrCDE active efflux pump in protecting *Ng*  
414 against host innate effectors has been demonstrated in the mouse model [67]. Antisera directed  
415 against the two surface-exposed MtrE loops could target *Ng* for complement-mediated  
416 bacteriolysis and opsonophagocytosis, and may possibly impair efflux pump function to increase  
417 *Ng* susceptibility to host innate effectors. The PilQ protein is critical for pilus secretion [68] and

418 mutations in PilQ are associated with increased entry of heme and antimicrobial compounds [69]  
419 and enhanced resistance to cephalosporin [70]. Amino acids 406 to 770 of *Nm* PilQ were shown  
420 to be a promising vaccine target, and are 94% identical with the same region of *Ng* PilQ (strain  
421 FA1090) [71]. BamA is a surface-exposed outer membrane belonging to the Omp85 family [72,  
422 73]. The essential role of BamA in outer membrane protein biogenesis suggests it may be a  
423 highly effective vaccine target as it is present in cell envelopes and OMVs, surface-exposed, and  
424 is well-conserved among clinical *Ng* isolates [39].

425 In summary, the demonstration that a licensed *Nm* OMV-based vaccine accelerates *Ng* in  
426 clearance in a genital tract infection mouse model is direct evidence that cross neisserial species  
427 protection may be an effective vaccine strategy for gonorrhea. Whether this approach would  
428 protect against *Ng* rectal or pharyngeal infections, which are very common, is not known and in  
429 the absence of animal or human challenge models for these infections, this question must be  
430 solely addressed by epidemiological or clinical trials. Future detailed immunological studies in  
431 mice, which can be experimentally manipulated to directly test hypothesized mechanisms of  
432 protection, combined with clinical research studies on 4CMenB-vaccinated humans should reveal  
433 new and important information on how to combat this ancient, highly successful pathogen.

434

## 435 **Materials and Methods**

### 436 **Bacterial strains and culture conditions**

437 *Ng* strains used in this study are listed in Table 2. Supplemented GC agar (Difco) was  
438 used to routinely propagate *Ng* as described [74]. GC-VNCTS agar [GC agar with vancomycin,  
439 colistin, nystatin, trimethoprim (VCNTS supplement; Difco) and 100 µg/ml streptomycin (Sm)] and  
440 heart infusion agar (HIA) were used to isolate *Ng* and facultatively anaerobic commensal flora,  
441 respectively, from murine vaginal swabs [75].

442

443 **Table 2. Bacterial strains used in this study**

444

| Strain                                            | Source                       | Location, Date        | Reference(s)                                     |
|---------------------------------------------------|------------------------------|-----------------------|--------------------------------------------------|
| <b><i>N. meningitidis</i></b>                     |                              |                       |                                                  |
| MC58                                              | blood                        | UK, 1983              | ATCC [76]                                        |
| <b><i>N. gonorrhoeae</i> (laboratory strains)</b> |                              |                       |                                                  |
| F62                                               | urogenital                   | Atlanta, GA, 1962     | [77]                                             |
| FA1090                                            | cervical (DGI)               | Chapel Hill, NC, 1983 | [78]                                             |
| FA6140 <i>pilQ2</i>                               | <i>pilQ</i> mutant of FA1090 |                       | [79]                                             |
| MS11                                              | cervical                     | Mt. Sinai, NY, 1972   | [80]                                             |
| DW3-MS11                                          | <i>mtrE</i> mutant of MS11   |                       | [81]                                             |
| FA19                                              | DGI                          | Copenhagen, 1959      | [82]                                             |
| <b><i>N. gonorrhoeae</i> (clinical isolates)</b>  |                              |                       |                                                  |
| H041                                              | pharyngeal                   | Japan, 2009           | [83]                                             |
| F89                                               | urethral                     | France, 2011          | [84]                                             |
| LGB20 <sup>a</sup>                                | urogenital                   | Baltimore, MD         | [85]                                             |
| LGB24 <sup>a</sup>                                | urogenital                   | Baltimore, MD         | [85]                                             |
| WAMC 7720 <sup>b</sup>                            | urethral                     | Fort Bragg, NC, 2014  | USU GC Isolate Reference Lab and Repository [86] |
| WAMC 7749 <sup>b</sup>                            | urethral                     | Fort Bragg, NC, 2014  | As above                                         |
| NMCP 4856 <sup>b</sup>                            | urine                        | Portsmouth, VA, 2017  | As above                                         |
| NMCP 9542 <sup>b</sup>                            | urine                        | Portsmouth, VA, 2017  | As above                                         |
| SAMMC 7363                                        | urine                        | San Antonio, TX, 2016 | As above                                         |
| MAMC 3183                                         | urethral                     | Tacoma, WA, 2015      | As above                                         |
| MAMC 3668                                         | urine                        | Tacoma, WA, 2019      | As above                                         |
| NMCSD 3277                                        | urine                        | San Diego, CA, 2016   | As above                                         |
| NMCSD 6364                                        | urethral                     | San Diego, CA, 2014   | As above                                         |

445

446 PorB phenotype determined by Phadebact Monoclonal GC Assay (MKL Diagnostics). All strains are PorB1b

447 except FA19, which is PorB1a. <sup>a</sup>LGB20 and LGB24 were collected between 1991 and 1994 and were kindly

448 provided by Dr. Margaret Bash, CBER/FDA. <sup>b</sup>WAMC isolates 7720 and 7749 were isolated 6 months apart

449 in 2014 (November and April, respectively) and NMCP isolates 4856 and 9542 were isolated 3 months  
450 apart in 2017 (March and June, respectively).

451

452

### 453 **Immunizations and challenge experiments.**

454 Four-week-old female BALB/c mice (Charles River; NCI Frederick strain of inbred  
455 BALB/cAnNCr mice, strain code 555) were used in these studies. In pilot immunization studies,  
456 groups of 5 mice each were immunized with 20, 100 or 250  $\mu$ L of 4CMenB (GSK) by the  
457 intraperitoneal (IP) or subcutaneous (SQ) routes on days 0 and 28. Two independent  
458 immunization and challenge experiments were conducted. For these experiments, 250  $\mu$ L of the  
459 vaccine were given IP or SC on days 0, 21 and 42. Control mice received PBS or alum in the form  
460 of Alhydrogel (InVivogen) diluted in PBS (n = 20-25 mice/group). Venous blood was collected on  
461 days 31 and 52; vaginal washes were collected on day 31. Three weeks after the final  
462 immunization, mice in the anestrus or the diestrus stage of the reproductive cycle were implanted  
463 subcutaneously with a 21-day slow-release 17 $\beta$ -estradiol pellet (Innovative Research of America)  
464 and treated with antibiotics to suppress overgrowth of potentially inhibitory flora as described [60].  
465 Two days after pellet implantation, mice were inoculated vaginally with 10<sup>6</sup> colony-forming units  
466 (CFU) of *Ng* strain F62. Vaginal swabs were quantitatively cultured for *Ng* on 7 consecutive days  
467 post-challenge and used to prepare stained smears to examine the influx of vaginal  
468 polymorphonuclear leukocytes (PMNs) [75].

469

### 470 **Enzyme-linked immunosorbent assay (ELISA) and western blots**

471 Serum or vaginal total Ig, IgG1, IgG2a and IgA were measured as endpoint titers as  
472 determined by standard ELISA [87]. Microtiter plates were coated with 20  $\mu$ L/well of a 1:5 dilution  
473 of the formulated Bexsero vaccine in 15 mM Na<sub>2</sub>CO<sub>3</sub>, 35 mM NaHCO<sub>3</sub>, pH 9.5, or with 4  $\mu$ g/ml of  
474 OMV from *Ng* strain F62. OMVs were isolated from supernatants from late-logarithmic phase

475 cultures that were centrifuged for 1 hour at 100,000 x g at 4 °C. Pellets were resuspended in 1  
476 mL of PBS. Protein concentration was determined by the BCA protein assay (Thermo Scientific).  
477 For whole-cell lysates (WCL) (total cellular proteins), bacteria from agar plates or mid-logarithmic  
478 phase cultures were centrifuged and the bacterial pellets suspended to an OD<sub>600</sub> = 0.5. One  
479 milliliter of this suspension was mixed with 60 µL of Laemmli sample buffer. For western blots,  
480 WCL (4 µL) or 20 µg of OMV were subjected to sodium dodecyl sulfate polyacrylamide gel  
481 electrophoresis (SDS-PAGE), transferred to nitrocellulose membranes, stained with Ponceau S,  
482 and blocked overnight with 0.5% Tween20 in PBS. Membranes were incubated with pooled  
483 antisera or vaginal washes from each experimental group diluted in block and washed three times  
484 with 0.05% Tween 20 in PBS. Secondary antibody was horseradish peroxidase (HRP)-conjugated  
485 anti-mouse IgG or IgA and a chemiluminescence HRP was used as substrate (GE Healthcare).  
486 Apparent molecular weight of bands was determined using a standard curve generated from  
487 molecular weight markers (r<sup>2</sup>=0.9916; [http://www.bio-](http://www.bio-rad.com/webroot/web/pdf/lsr/literature/Bulletin_6210.pdf)  
488 [rad.com/webroot/web/pdf/lsr/literature/Bulletin\\_6210.pdf](http://www.bio-rad.com/webroot/web/pdf/lsr/literature/Bulletin_6210.pdf)). For western blots with LOS, proteinase  
489 K-treated bacterial extracts were generated as described [88] without the phenol treatment step,  
490 separated on 16% tricine gels (Novex) and probed with 1:10,000 dilutions of pooled serum from  
491 immunized and control mice followed by HRP-conjugated anti-mouse IgG as above.

492

### 493 **Immunoprecipitation and mass spectrometry**

494 Two milliliters of a *Ng* suspension (OD<sub>600</sub> = 1) prepared from a mid-logarithmic phase Gc  
495 broth culture were mixed with 30 µL of antisera for 20 minute at room temperature. Cell pellets  
496 were washed once with GCB and solubilized in 2% Zwittergent 3,14 (EMD Millipore) in PBS for  
497 one hour at 37°C. The solubilized suspension was centrifuged for 10 minutes at 2,0000 x g, the  
498 supernatant mixed with protein A/G resin (ExAlpha Biologicals) for two hours at 4°C with mixing,  
499 and the resin washed three times with 0.5% Zwittergent 3,14 in PBS, and once with PBS alone.

500 The resin was suspended in 50  $\mu$ L Laemmli sample buffer without  $\beta$ -mercaptoethanol and  
501 subjected to SDS-PAGE for Western blotting; a duplicate gel was run in parallel and stained with  
502 Coomassie G-250. Bands from the stained gel were submitted to the Michael Hooker Proteomics  
503 Center at the University of North Carolina at Chapel Hill for trypsin digest and identification using  
504 mass spectrometry. Accession ID numbers of proteins described in this report are disclosed in  
505 Table 1 and Supp. Table 1. Alignment of amino acid sequences was performed using ClustalW.

506

### 507 **Bactericidal assay**

508 A modification of a previously described bactericidal assay [89] was used to test the  
509 bactericidal activity of serum from immunized mice. Pooled sera from immunized and control mice  
510 were heated at 56°C for 30 min and serially diluted 1:2 in minimal essential medium (MEM) (1:30  
511 – 1:960). Fifty microliters of each dilution were pipetted into wells of a 96-well microtiter plate. Fifty  
512 microliters of an MEM suspension containing 100-400 CFU of the target strain were added to the  
513 wells and to a well containing 50  $\mu$ L of MEM alone. After 5 minutes incubation at RT, 50  $\mu$ L of  
514 pooled normal human serum (NHS) (PelFreeze) were added to each well (final concentration  
515 10%) and the plate was incubated for 55 minutes at 37°C in 5% CO<sub>2</sub>. Fifty microliters of GC broth  
516 were then added, mixed, and 50  $\mu$ L aliquots were cultured in duplicate on GC agar and incubated  
517 overnight. The antiserum dilution that gave 50% recovery compared to wells without antiserum  
518 was defined as the bactericidal<sub>50</sub> titer. Wells containing heat-inactivated NHS were tested in  
519 parallel to measure complement-independent loss of bacterial viability during the assay; no  
520 appreciable loss was detected in any experiment. The assay was performed against each strain  
521 in two or three independent experiments.

522

## 523 **Statistical analysis**

524 ELISA titers were compared by a Kruskal-Wallis test with Dunn's multiple comparison. For  
525 challenge experiments, the percentage of mice with positive cultures at each time point was  
526 plotted for each experimental group as a Kaplan Meier curve and analyzed by the Log Rank test.  
527 The number of CFU recovered from vaginal swabs over time was compared by repeated  
528 measures ANOVA with Bonferroni correction. The area under the curve (AUC) was calculated for  
529 each individual mouse by determining the AUC across the 7 culture time points that was above  
530 the limit of detection (20 CFU/mL). Differences between AUC and percentage of vaginal PMNs  
531 were compared using a Kruskal-Wallis test with Dunn's multiple comparison. Statistical analyses  
532 were performed using the software Prism (GraphPad Software, La Jolla, CA). Raw data used for  
533 statistical analysis of ELISA, *in vivo* efficacy testing, and bactericidal assays have been published  
534 [90].

535

## 536 **Animal ethics statement**

537 All animal experiments were conducted at the Uniformed Services University according to  
538 guidelines established by the Association for the Assessment and Accreditation of Laboratory  
539 Animal Care using a protocol approved by the University's Institutional Animal Care and Use  
540 Committee.

541

## 542 **Acknowledgements**

543

544           The authors wish to thank Thomas Hiltke, Carolyn Deal and Leah Vincent for helpful  
545 discussions, Ian Feavers and Carolyn Vipond for technical advice on ELISAs using 4CMenB as  
546 the coating antigen, Melissa Samo for conducting the ELISAs early in this study, and James E.  
547 Anderson for providing *Ng* mutant strains, protocols and helpful suggestions. We are also grateful  
548 to Rachel Rowland for preparation of media and assistance with animal handling. Mass  
549 spectrometry services were provided by the Michael Hooker Proteomics core facility at the  
550 University of North Carolina at Chapel Hill.

551



## 553 **References**

- 554 1. Newman L, Rowley J, Vander Hoorn S, Wijesooriya NS, Unemo M, Low N, et al.  
555 Global estimates of the prevalence and incidence of four curable sexually  
556 transmitted infections in 2012 based on systematic review and global reporting.  
557 PLoS one. 2015;10(12):e0143304. Epub 2015/12/10. doi:  
558 10.1371/journal.pone.0143304. PubMed PMID: 26646541; PubMed Central  
559 PMCID: PMC4672879.
- 560 2. Bowen VB, Braxton J, Davis DW, Flagg EW, Grey J, Grier L, et al. Sexually  
561 transmitted disease surveillance 2018. doi: 10.15620/cdc.79370. PubMed PMID:  
562 cdc:79370.
- 563 3. Hook EW, Holmes KK. Gonococcal infections. *Ann. Intern. Med.* 1985;102(2):229-  
564 43. doi: 10.7326/0003-4819-102-2-229. PubMed PMID: 3917638.
- 565 4. Palafox SKV JS, Tauber AD, Foster SC. Ophthalmia neonatorum. *J Clin  
566 Experiment Ophthalmol.* 2011;2(1):1-5. doi: 10.4172/2155-9570.1000119.
- 567 5. Borges-Costa J, Matos C, Pereira F. Sexually transmitted infections in pregnant  
568 adolescents: prevalence and association with maternal and foetal morbidity. *J Eur  
569 Acad Dermatol Venereol.* 2012;26(8):972-5. Epub 2011/07/30. doi: 10.1111/j.1468-  
570 3083.2011.04194.x. PubMed PMID: 21797933.
- 571 6. Cohen MS, Hoffman IF, Royce RA, Kazembe P, Dyer JR, Daly CC, et al. Reduction  
572 of concentration of HIV-1 in semen after treatment of urethritis: implications for  
573 prevention of sexual transmission of HIV-1. AIDSCAP Malawi research group.  
574 *Lancet.* 1997;349(9069):1868-73. Epub 1997/06/28. doi: 10.1016/s0140-  
575 6736(97)02190-9. PubMed PMID: 9217758.

- 576 7. Mlisana K, Naicker N, Werner L, Roberts L, van Loggerenberg F, Baxter C, et al.  
577 Symptomatic vaginal discharge is a poor predictor of sexually transmitted infections  
578 and genital tract inflammation in high-risk women in South Africa. *J Infect Dis.*  
579 2012;206(1):6-14. Epub 2012/04/21. doi: 10.1093/infdis/jis298. PubMed PMID:  
580 22517910; PubMed Central PMCID: PMCPMC3490689.
- 581 8. Wi T, Lahra MM, Ndowa F, Bala M, Dillon JR, Ramon-Pardo P, et al. Antimicrobial  
582 resistance in *Neisseria gonorrhoeae*: global surveillance and a call for international  
583 collaborative action. *PLoS Med.* 2017;14(7):e1002344. Epub 2017/07/08. doi:  
584 10.1371/journal.pmed.1002344. PubMed PMID: 28686231; PubMed Central  
585 PMCID: PMCPMC5501266.
- 586 9. Chisholm SA, Dave J, Ison CA. High-level azithromycin resistance occurs in  
587 *Neisseria gonorrhoeae* as a result of a single point mutation in the 23S rRNA  
588 genes. *Antimicrob Agents Chemother.* 2010;54(9):3812-6. doi:  
589 10.1128/AAC.00309-10. PubMed PMID: 20585125; PubMed Central PMCID:  
590 PMC2935028.
- 591 10. Terkelsen D, Tolstrup J, Johnsen CH, Lund O, Larsen HK, Worning P, et al.  
592 Multidrug-resistant *Neisseria gonorrhoeae* infection with ceftriaxone resistance and  
593 intermediate resistance to azithromycin, Denmark, 2017. *Euro Surveill.*  
594 2017;22(42). Epub 2017/10/27. doi: 10.2807/1560-7917.ES.2017.22.42.17-00659.  
595 PubMed PMID: 29067905; PubMed Central PMCID: PMCPMC5710115.
- 596 11. Alirol E, Wi TE, Bala M, Bazzo ML, Chen XS, Deal C, et al. Multidrug-resistant  
597 gonorrhea: a research and development roadmap to discover new medicines. *PLoS*

- 598 Med. 2017;14(7):e1002366. Epub 2017/07/27. doi: 10.1371/journal.pmed.1002366.  
599 PubMed PMID: 28746372; PubMed Central PMCID: PMCPMC5528252.
- 600 12. Unemo M, Shafer WM. Future treatment of gonorrhoea--novel emerging drugs are  
601 essential and in progress? *Expert Opin Emerg Drugs*. 2015;20(3):357-60. Epub  
602 2015/04/25. doi: 10.1517/14728214.2015.1039981. PubMed PMID: 25907334;  
603 PubMed Central PMCID: PMCPMC4550495.
- 604 13. Gottlieb SL, Jerse AE, Delany-Moretlwe S, Deal C, Giersing BK. Advancing vaccine  
605 development for gonorrhoea and the global STI vaccine roadmap. *Sex Health*.  
606 2019. Epub 2019/09/03. doi: 10.1071/SH19060. PubMed PMID: 31476278.
- 607 14. Wetzler LM, Feavers IM, Gray-Owen SD, Jerse AE, Rice PA, Deal CD. Summary  
608 and recommendations from the National Institute of Allergy and Infectious Diseases  
609 (NIAID) workshop "gonorrhoea vaccines: the way forward". *Clin Vaccine Immunol*.  
610 2016;23(8):656-63. Epub 2016/06/24. doi: 10.1128/CVI.00230-16. PubMed PMID:  
611 27335384; PubMed Central PMCID: PMCPMC4979170.
- 612 15. Greenberg L, Diena BB, Ashton FA, Wallace R, Kenny CP, Znamirovski R, et al.  
613 Gonococcal vaccine studies in Inuvik. *Can J Public Health*. 1974;65(1):29-33. Epub  
614 1974/01/01. PubMed PMID: 4205640.
- 615 16. Boslego JW, Tramont EC, Chung RC, McChesney DG, Ciak J, Sadoff JC, et al.  
616 Efficacy trial of a parenteral gonococcal pilus vaccine in men. *Vaccine*.  
617 1991;9(3):154-62. Epub 1991/03/11. doi: 10.1016/0264-410x(91)90147-x. PubMed  
618 PMID: 1675029.
- 619 17. Zhu W, Chen CJ, Thomas CE, Anderson JE, Jerse AE, Sparling PF. Vaccines for  
620 gonorrhoea: can we rise to the challenge? *Front Microbiol*. 2011;2:124. Epub

- 621 2011/06/21. doi: 10.3389/fmicb.2011.00124. PubMed PMID: 21687431; PubMed  
622 Central PMCID: PMCPMC3109613.
- 623 18. Rice PA, Shafer WM, Ram S, Jerse AE. *Neisseria gonorrhoeae*: drug resistance,  
624 mouse models, and vaccine development. Annu Rev Microbiol. 2017;71:665-86.  
625 Epub 2017/09/10. doi: 10.1146/annurev-micro-090816-093530. PubMed PMID:  
626 28886683.
- 627 19. Lovett A, Duncan JA. Human immune responses and the natural history of  
628 *Neisseria gonorrhoeae* infection. Front Immunol. 2018;9:3187. Epub 2019/03/07.  
629 doi: 10.3389/fimmu.2018.03187. PubMed PMID: 30838004; PubMed Central  
630 PMCID: PMCPMC6389650.
- 631 20. Russell MW, Jerse AE, Gray-Owen SD. Progress toward a gonococcal vaccine: the  
632 way forward. Front Immunol. 2019;10:2417. Epub 2019/11/05. doi:  
633 10.3389/fimmu.2019.02417. PubMed PMID: 31681305; PubMed Central PMCID:  
634 PMCPMC6803597.
- 635 21. Duncan JA, Gao X, Huang MT, O'Connor BP, Thomas CE, Willingham SB, et al.  
636 *Neisseria gonorrhoeae* activates the proteinase cathepsin B to mediate the  
637 signaling activities of the NLRP3 and ASC-containing inflammasome. J Immunol.  
638 2009;182(10):6460-9. Epub 2009/05/06. doi: 10.4049/jimmunol.0802696. PubMed  
639 PMID: 19414800; PubMed Central PMCID: PMCPMC2722440.
- 640 22. Liu Y, Islam EA, Jarvis GA, Gray-Owen SD, Russell MW. *Neisseria gonorrhoeae*  
641 selectively suppresses the development of Th1 and Th2 cells, and enhances Th17  
642 cell responses, through TGF-beta-dependent mechanisms. Mucosal Immunol.

- 643 2012;5(3):320-31. Epub 2012/02/23. doi: 10.1038/mi.2012.12. PubMed PMID:  
644 22354319; PubMed Central PMCID: PMCPMC3328619.
- 645 23. Liu Y, Liu W, Russell MW. Suppression of host adaptive immune responses by  
646 *Neisseria gonorrhoeae*: role of interleukin 10 and type 1 regulatory T cells. Mucosal  
647 immunol. 2014;7(1):165-76. doi: 10.1038/mi.2013.36. PubMed PMID: 23757303;  
648 PubMed Central PMCID: PMC3812424.
- 649 24. Zhu W, Tomberg J, Knilans KJ, Anderson JE, McKinnon KP, Sempowski GD, et al.  
650 Properly folded and functional PorB from *Neisseria gonorrhoeae* inhibits dendritic  
651 cell stimulation of CD4(+) T cell proliferation. J Biol Chem. 2018;293(28):11218-29.  
652 Epub 2018/05/13. doi: 10.1074/jbc.RA117.001209. PubMed PMID: 29752412;  
653 PubMed Central PMCID: PMCPMC6052219.
- 654 25. Zhu W, Ventevogel MS, Knilans KJ, Anderson JE, Oldach LM, McKinnon KP, et al.  
655 *Neisseria gonorrhoeae* suppresses dendritic cell-induced, antigen-dependent CD4  
656 T cell proliferation. PLoS one. 2012;7(7):e41260. Epub 2012/07/31. doi:  
657 10.1371/journal.pone.0041260. PubMed PMID: 22844448; PubMed Central  
658 PMCID: PMCPMC3402525.
- 659 26. Petousis-Harris H, Paynter J, Morgan J, Saxton P, McArdle B, Goodyear-Smith F,  
660 et al. Effectiveness of a group B outer membrane vesicle meningococcal vaccine  
661 against gonorrhoea in New Zealand: a retrospective case-control study. Lancet.  
662 2017. doi: 10.1016/S0140-6736(17)31449-6. PubMed PMID: 28705462.
- 663 27. Petousis-Harris H. Impact of meningococcal group B OMV vaccines, beyond their  
664 brief. Hum Vaccin Immunother. 2018;14(5):1058-63. Epub 2017/10/20. doi:

- 665 10.1080/21645515.2017.1381810. PubMed PMID: 29048985; PubMed Central  
666 PMCID: PMCPMC5989908.
- 667 28. Serruto D, Bottomley MJ, Ram S, Giuliani MM, Rappuoli R. The new  
668 multicomponent vaccine against meningococcal serogroup B, 4CMenB:  
669 immunological, functional and structural characterization of the antigens. *Vaccine*.  
670 2012;30 Suppl 2:B87-97. Epub 2012/05/25. doi: 10.1016/j.vaccine.2012.01.033.  
671 PubMed PMID: 22607904; PubMed Central PMCID: PMCPMC3360877.
- 672 29. Hadad R, Jacobsson S, Pizza M, Rappuoli R, Fredlund H, Olcen P, et al. Novel  
673 meningococcal 4CMenB vaccine antigens - prevalence and polymorphisms of the  
674 encoding genes in *Neisseria gonorrhoeae*. *APMIS*. 2012;120(9):750-60. Epub  
675 2012/08/14. doi: 10.1111/j.1600-0463.2012.02903.x. PubMed PMID: 22882265.
- 676 30. Semchenko EA, Tan A, Borrow R, Seib KL. The serogroup B meningococcal  
677 vaccine Bexsero elicits antibodies to *Neisseria gonorrhoeae*. *Clin Infect Dis*.  
678 2019;69(7):1101-11. Epub 2018/12/15. doi: 10.1093/cid/ciy1061. PubMed PMID:  
679 30551148; PubMed Central PMCID: PMCPMC6743822.
- 680 31. Dalal SJ, Estep JS, Valentin-Bon IE, Jerse AE. Standardization of the Whitten  
681 Effect to induce susceptibility to *Neisseria gonorrhoeae* in female mice. *Contemp*  
682 *Top Lab Anim Sci*. 2001;40(2):13-7. Epub 2001/04/13. PubMed PMID: 11300681.
- 683 32. Schmiel DH, Moran EE, Keiser PB, Brandt BL, Zollinger WD. Importance of  
684 antibodies to lipopolysaccharide in natural and vaccine-induced serum bactericidal  
685 activity against *Neisseria meningitidis* group B. *Infect Immun*. 2011;79(10):4146-56.  
686 Epub 2011/07/20. doi: 10.1128/IAI.05125-11. PubMed PMID: 21768280; PubMed  
687 Central PMCID: PMCPMC3187254.

- 688 33. Kahler CM, Stephens DS. Genetic basis for biosynthesis, structure, and function of  
689 meningococcal lipooligosaccharide (endotoxin). *Crit Rev Microbiol*. 1998;24(4):281-  
690 334. Epub 1999/01/15. doi: 10.1080/10408419891294216. PubMed PMID:  
691 9887366.
- 692 34. Banerjee A, Wang R, Uljon SN, Rice PA, Gotschlich EC, Stein DC. Identification of  
693 the gene (*lgtG*) encoding the lipooligosaccharide beta chain synthesizing glucosyl  
694 transferase from *Neisseria gonorrhoeae*. *PNAS*. 1998;95(18):10872-7. Epub  
695 1998/09/02. doi: 10.1073/pnas.95.18.10872. PubMed PMID: 9724797; PubMed  
696 Central PMCID: PMCPMC27988.
- 697 35. Gotschlich EC. Genetic locus for the biosynthesis of the variable portion of  
698 *Neisseria gonorrhoeae* lipooligosaccharide. *J Exp Med*. 1994;180(6):2181-90. Epub  
699 1994/12/01. doi: 10.1084/jem.180.6.2181. PubMed PMID: 7964493; PubMed  
700 Central PMCID: PMCPMC2191774.
- 701 36. Gulati S, Shaughnessy J, Ram S, Rice PA. Targeting lipooligosaccharide (LOS) for  
702 a gonococcal vaccine. *Front Immunol*. 2019;10:321. Epub 2019/03/16. doi:  
703 10.3389/fimmu.2019.00321. PubMed PMID: 30873172; PubMed Central PMCID:  
704 PMCPMC6400993.
- 705 37. Schneider H, Griffiss JM, Boslego JW, Hitchcock PJ, Zahos KM, Apicella MA.  
706 Expression of paragloboside-like lipooligosaccharides may be a necessary  
707 component of gonococcal pathogenesis in men. *J Exp Med*. 1991;174(6):1601-5.  
708 Epub 1991/12/01. doi: 10.1084/jem.174.6.1601. PubMed PMID: 1744587; PubMed  
709 Central PMCID: PMCPMC2119043.

- 710 38. Collins RF, Davidsen L, Derrick JP, Ford RC, Tonjum T. Analysis of the PilQ  
711 secretin from *Neisseria meningitidis* by transmission electron microscopy reveals a  
712 dodecameric quaternary structure. J. Bacteriol. 2001;183(13):3825-32. Epub  
713 2001/06/08. doi: 10.1128/JB.183.13.3825-3832.2001. PubMed PMID: 11395444;  
714 PubMed Central PMCID: PMCPMC95263.
- 715 39. Zielke RA, Wierzbicki IH, Baarda BI, Gafken PR, Soge OO, Holmes KK, et al.  
716 Proteomics-driven antigen discovery for development of vaccines against  
717 gonorrhea. Mol Cell Proteomics. 2016;15(7):2338-55. Epub 2016/05/04. doi:  
718 10.1074/mcp.M116.058800. PubMed PMID: 27141096; PubMed Central PMCID:  
719 PMCPMC4937508.
- 720 40. Golparian D, Shafer WM, Ohnishi M, Unemo M. Importance of multidrug efflux  
721 pumps in the antimicrobial resistance property of clinical multidrug-resistant isolates  
722 of *Neisseria gonorrhoeae*. Antimicrob Agents Chemother. 2014;58(6):3556-9. Epub  
723 2014/04/16. doi: 10.1128/AAC.00038-14. PubMed PMID: 24733458; PubMed  
724 Central PMCID: PMCPMC4068427.
- 725 41. Sim RJ, Harrison MM, Moxon ER, Tang CM. Underestimation of meningococci in  
726 tonsillar tissue by nasopharyngeal swabbing. Lancet. 2000;356(9242):1653-4. Epub  
727 2000/11/23. doi: 10.1016/s0140-6736(00)03162-7. PubMed PMID: 11089827.
- 728 42. Ward ME, Watt PJ. Adherence of *Neisseria gonorrhoeae* to urethral mucosal cells:  
729 an electron-microscopic study of human gonorrhea. J Infect Dis. 1972;126(6):601-5.  
730 Epub 1972/12/01. doi: 10.1093/infdis/126.6.601. PubMed PMID: 4197757.
- 731 43. Feavers IM, Maiden MCJ. Recent progress in the prevention of serogroup B  
732 meningococcal disease. Clin Vaccine Immunol. 2017;24(5). Epub 2017/03/31. doi:



- 733 10.1128/CVI.00566-16. PubMed PMID: 28356256; PubMed Central PMCID:  
734 PMCPMC5424234.
- 735 44. Goldschneider I, Gotschlich EC, Artenstein MS. Human immunity to the  
736 meningococcus. I. The role of humoral antibodies. *J Exp Med.* 1969;129(6):1307-  
737 26. Epub 1969/06/01. doi: 10.1084/jem.129.6.1307. PubMed PMID: 4977280;  
738 PubMed Central PMCID: PMCPMC2138650.
- 739 45. Leuzzi R, Serino L, Scarselli M, Savino S, Fontana MR, Monaci E, et al. Ng-MIP, a  
740 surface-exposed lipoprotein of *Neisseria gonorrhoeae*, has a peptidyl-prolyl  
741 cis/trans isomerase (PPIase) activity and is involved in persistence in  
742 macrophages. *Mol Microbiol.* 2005;58(3):669-81. Epub 2005/10/22. doi:  
743 10.1111/j.1365-2958.2005.04859.x. PubMed PMID: 16238618.
- 744 46. Serino L, Nesta B, Leuzzi R, Fontana MR, Monaci E, Mocca BT, et al. Identification  
745 of a new ompa-like protein in *Neisseria gonorrhoeae* involved in the binding to  
746 human epithelial cells and in vivo colonization. *Mol Microbiol.* 2007;64(5):1391-403.  
747 Epub 2007/06/05. doi: 10.1111/j.1365-2958.2007.05745.x. PubMed PMID:  
748 17542928.
- 749 47. Rechner C, Kuhlewein C, Muller A, Schild H, Rudel T. Host glycoprotein Gp96 and  
750 scavenger receptor SREC interact with PorB of disseminating *Neisseria*  
751 *gonorrhoeae* in an epithelial invasion pathway. *Cell Host Microbe.* 2007;2(6):393-  
752 403. Epub 2007/12/15. doi: 10.1016/j.chom.2007.11.002. PubMed PMID:  
753 18078691.

- 754 48. Cornelissen CN. Subversion of nutritional immunity by the pathogenic *Neisseriae*.  
755 Pathog Dis. 2018;76(1). Epub 2017/10/19. doi: 10.1093/femspd/ftx112. PubMed  
756 PMID: 29045638; PubMed Central PMCID: PMC6251569.
- 757 49. Islam EA, Anipindi VC, Francis I, Shaik-Dasthagirisahab Y, Xu S, Leung N, et al.  
758 Specific binding to differentially expressed human carcinoembryonic antigen-related  
759 cell adhesion molecules determines the outcome of *Neisseria gonorrhoeae*  
760 infections along the female reproductive tract. Infect Immun. 2018;86(8). Epub  
761 2018/05/16. doi: 10.1128/IAI.00092-18. PubMed PMID: 29760215; PubMed Central  
762 PMCID: PMC6056862.
- 763 50. Pajon R, Buckwalter CM, Johswich KO, Gray-Owen SD, Granoff DM. A native outer  
764 membrane vesicle vaccine confers protection against meningococcal colonization in  
765 human CEACAM1 transgenic mice. Vaccine. 2015;33(11):1317-23. Epub  
766 2015/02/11. doi: 10.1016/j.vaccine.2015.01.057. PubMed PMID: 25662856;  
767 PubMed Central PMCID: PMC4361389.
- 768 51. Zarantonelli ML, Szatanik M, Giorgini D, Hong E, Huerre M, Guillou F, et al.  
769 Transgenic mice expressing human transferrin as a model for meningococcal  
770 infection. Infect Immun. 2007;75(12):5609-14. Epub 2007/09/26. doi:  
771 10.1128/IAI.00781-07. PubMed PMID: 17893132; PubMed Central PMCID:  
772 PMC2168318.
- 773 52. Gulati S, Beurskens FJ, de Kreuk BJ, Roza M, Zheng B, DeOliveira RB, et al.  
774 Complement alone drives efficacy of a chimeric antigenococcal monoclonal  
775 antibody. PLoS Biol. 2019;17(6):e3000323. Epub 2019/06/20. doi:  
776 10.1371/journal.pbio.3000323.

- 777 53. Fisseha M, Chen P, Brandt B, Kijek T, Moran E, Zollinger W. Characterization of  
778 native outer membrane vesicles from *lpxL* mutant strains of *Neisseria meningitidis*  
779 for use in parenteral vaccination. *J Infect Immun.* 2005;73(7):4070-80. Epub  
780 2005/06/24. doi: 10.1128/IAI.73.7.4070-4080.2005. PubMed PMID: 15972495;  
781 PubMed Central PMCID: PMCPMC1168616.
- 782 54. Saunders NB, Shoemaker DR, Brandt BL, Moran EE, Larsen T, Zollinger WD.  
783 Immunogenicity of intranasally administered meningococcal native outer membrane  
784 vesicles in mice. *Infect Immun.* 1999;67(1):113-9. Epub 1998/12/24. PubMed PMID:  
785 9864204; PubMed Central PMCID: PMCPMC96285.
- 786 55. Beernink PT, Shaughnessy J, Braga EM, Liu Q, Rice PA, Ram S, et al. A  
787 meningococcal factor H binding protein mutant that eliminates factor H binding  
788 enhances protective antibody responses to vaccination. *J Immunol.*  
789 2011;186(6):3606-14. Epub 2011/02/18. doi: 10.4049/jimmunol.1003470. PubMed  
790 PMID: 21325619; PubMed Central PMCID: PMCPMC3098282.
- 791 56. Vu DM, Pajon R, Reason DC, Granoff DM. A broadly cross-reactive monoclonal  
792 antibody against an epitope on the N-terminus of meningococcal fHbp. *Sci Rep.*  
793 2012;2:341. Epub 2012/03/31. doi: 10.1038/srep00341. PubMed PMID: 22461972;  
794 PubMed Central PMCID: PMCPMC3314305.
- 795 57. Hobbs MM, Duncan JA. Experimental human infection with *Neisseria gonorrhoeae*.  
796 *Methods Mol Biol.* 2019;1997:431-52. Epub 2019/05/24. doi: 10.1007/978-1-4939-  
797 9496-0\_25. PubMed PMID: 31119638.
- 798 58. Feinen B, Russell MW. Contrasting roles of IL-22 and IL-17 in murine genital tract  
799 infection by *Neisseria gonorrhoeae*. *Front Immunol.* 2012;3:11. doi:

- 800 10.3389/fimmu.2012.00011. PubMed PMID: 22566897; PubMed Central PMCID:  
801 PMC3342391.
- 802 59. Packiam M, Wu H, Veit SJ, Mavrogiorgos N, Jerse AE, Ingalls RR. Protective role  
803 of toll-like receptor 4 in experimental gonococcal infection of female mice. *Mucosal*  
804 *Immunol.* 2012;5(1):19-29. doi: 10.1038/mi.2011.38. PubMed PMID: 21937985;  
805 PubMed Central PMCID: PMC3240729.
- 806 60. Jerse AE, Wu H, Packiam M, Vonck RA, Begum AA, Garvin LE. Estradiol-treated  
807 female mice as surrogate hosts for *Neisseria gonorrhoeae* genital tract infections.  
808 *Front Microbiol.* 2011;2:107. doi: 10.3389/fmicb.2011.00107. PubMed PMID:  
809 21747807; PubMed Central PMCID: PMC3129519.
- 810 61. Hobbs MM, Anderson JE, Balthazar JT, Kandler JL, Carlson RW, Ganguly J, et al.  
811 Lipid A's structure mediates *Neisseria gonorrhoeae* fitness during experimental  
812 infection of mice and men. *mBio.* 2013;4(6):e00892-13. Epub 2013/11/21. doi:  
813 10.1128/mBio.00892-13. PubMed PMID: 24255126; PubMed Central PMCID:  
814 PMCPMC3870242.
- 815 62. Liu Y, Hammer LA, Liu W, Hobbs MM, Zielke RA, Sikora AE, et al. Experimental  
816 vaccine induces Th1-driven immune responses and resistance to *Neisseria*  
817 *gonorrhoeae* infection in a murine model. *Mucosal Immunol.* 2017;10(6):1594-608.  
818 Epub 2017/03/09. doi: 10.1038/mi.2017.11. PubMed PMID: 28272393; PubMed  
819 Central PMCID: PMCPMC5591041.
- 820 63. Liu Y, Egilmez NK, Russell MW. Enhancement of adaptive immunity to *Neisseria*  
821 *gonorrhoeae* by local intravaginal administration of microencapsulated interleukin

- 822 12. J Infect Dis. 2013;208(11):1821-9. doi: 10.1093/infdis/jit354. PubMed PMID:  
823 24048962; PubMed Central PMCID: PMC3814831.
- 824 64. Rodrigues CMC, Chan H, Vipond C, Jolley K, Harrison OB, Wheeler J, et al. Typing  
825 complex meningococcal vaccines to understand diversity and population structure  
826 of key vaccine antigens. Wellcome Open Res. 2018;3:151. Epub 2019/04/02. doi:  
827 10.12688/wellcomeopenres.14859.2. PubMed PMID: 30687793; PubMed Central  
828 PMCID: PMC6338130.2.
- 829 65. Lei HT, Chou TH, Su CC, Bolla JR, Kumar N, Radhakrishnan A, et al. Crystal  
830 structure of the open state of the *Neisseria gonorrhoeae* MtrE outer membrane  
831 channel. PLoS one. 2014;9(6):e97475. Epub 2014/06/06. doi:  
832 10.1371/journal.pone.0097475. PubMed PMID: 24901251; PubMed Central  
833 PMCID: PMC4046963.
- 834 66. Ohneck EA DAJ, Kunz AN, Jerse AE and WM Shafer. Clinically relevant antibiotic  
835 resistance mechanisms can enhance the *in vivo* fitness of *Neisseria gonorrhoeae*.  
836 In: Pana M, editor. Antibiotic resistant bacteria. Rijeka, Croatia: Intech Publications;  
837 2012. p. 1-17.
- 838 67. Jerse AE, Sharma ND, Simms AN, Crow ET, Snyder LA, Shafer WM. A gonococcal  
839 efflux pump system enhances bacterial survival in a female mouse model of genital  
840 tract infection. Infect Immun. 2003;71(10):5576-82. PubMed PMID: 14500476;  
841 PubMed Central PMCID: PMC201053.
- 842 68. Helm RA, Barnhart MM, Seifert HS. *pilQ* Missense mutations have diverse effects  
843 on PilQ multimer formation, piliation, and pilus function in *Neisseria gonorrhoeae*. J.

- 844 Bacteriol. 2007;189(8):3198-207. Epub 2007/02/06. doi: 10.1128/JB.01833-06.  
845 PubMed PMID: 17277065; PubMed Central PMCID: PMCPMC1855849.
- 846 69. Chen CJ, Tobiason DM, Thomas CE, Shafer WM, Seifert HS, Sparling PF. A  
847 mutant form of the *Neisseria gonorrhoeae* pilus secretin protein PilQ allows  
848 increased entry of heme and antimicrobial compounds. J. Bacteriol.  
849 2004;186(3):730-9. Epub 2004/01/20. doi: 10.1128/jb.186.3.730-739.2004. PubMed  
850 PMID: 14729699; PubMed Central PMCID: PMCPMC321488.
- 851 70. Johnson SR, Grad Y, Ganakammal SR, Burroughs M, Frace M, Lipsitch M, et al. *In*  
852 *vitro* selection of *Neisseria gonorrhoeae* mutants with elevated MIC values and  
853 increased resistance to cephalosporins. Antimicrob Agents Chemother.  
854 2014;58(11):6986-9. Epub 2014/09/10. doi: 10.1128/AAC.03082-14. PubMed  
855 PMID: 25199775; PubMed Central PMCID: PMCPMC4249396.
- 856 71. Haghi F, Peerayeh SN, Siadat SD, Zeighami H. Recombinant outer membrane  
857 secretin PilQ(406-770) as a vaccine candidate for serogroup B *Neisseria*  
858 *meningitidis*. Vaccine. 2012;30(9):1710-4. Epub 2012/01/12. doi:  
859 10.1016/j.vaccine.2011.12.076. PubMed PMID: 22234267.
- 860 72. Gentle IE, Burri L, Lithgow T. Molecular architecture and function of the Omp85  
861 family of proteins. Mol Microbiol. 2005;58(5):1216-25. Epub 2005/11/30. doi:  
862 10.1111/j.1365-2958.2005.04906.x. PubMed PMID: 16313611.
- 863 73. Heinz E, Lithgow T. A comprehensive analysis of the Omp85/TpsB protein  
864 superfamily structural diversity, taxonomic occurrence, and evolution. Front  
865 Microbiol. 2014;5:370. Epub 2014/08/08. doi: 10.3389/fmicb.2014.00370. PubMed  
866 PMID: 25101071; PubMed Central PMCID: PMCPMC4104836.

- 867 74. Cohen MS, Cannon JG. Human experimentation with *Neisseria gonorrhoeae*:  
868 progress and goals. J Infect Dis. 1999;179 Suppl 2:S375-9. doi: 10.1086/513847.  
869 PubMed PMID: 10081510.
- 870 75. Jerse AE. Experimental gonococcal genital tract infection and opacity protein  
871 expression in estradiol-treated mice. Infect Immun. 1999;67(11):5699-708. PubMed  
872 PMID: 10531218; PubMed Central PMCID: PMC96944.
- 873 76. Tettelin H, Saunders NJ, Heidelberg J, Jeffries AC, Nelson KE, Eisen JA, et al.  
874 Complete genome sequence of *Neisseria meningitidis* serogroup B strain MC58.  
875 Science. 2000;287(5459):1809-15. Epub 2000/03/10. doi:  
876 10.1126/science.287.5459.1809. PubMed PMID: 10710307.
- 877 77. Kellogg DS, Jr., Peacock WL, Jr., Deacon WE, Brown L, Pirkle DI. *Neisseria*  
878 *gonorrhoeae*. I. Virulence genetically linked to clonal variation. J. Bacteriol.  
879 1963;85:1274-9. PubMed PMID: 14047217; PubMed Central PMCID: PMC278328.
- 880 78. Cohen MS, Cannon JG, Jerse AE, Charniga LM, Isbey SF, Whicker LG. Human  
881 experimentation with *Neisseria gonorrhoeae*: rationale, methods, and implications  
882 for the biology of infection and vaccine development. J Infect Dis. 1994;169(3):532-  
883 7. Epub 1994/03/01. doi: 10.1093/infdis/169.3.532. PubMed PMID: 8158024.
- 884 79. Zhao S, Tobiason DM, Hu M, Seifert HS, Nicholas RA. The *penC* mutation  
885 conferring antibiotic resistance in *Neisseria gonorrhoeae* arises from a mutation in  
886 the PilQ secretin that interferes with multimer stability. Mol Microbiol.  
887 2005;57(5):1238-51. Epub 2005/08/17. doi: 10.1111/j.1365-2958.2005.04752.x.  
888 PubMed PMID: 16101998; PubMed Central PMCID: PMCPMC2673695.

- 889 80. Swanson J. Studies on gonococcus infection. li. Freeze-fracture, freeze-etch  
890 studies on gonocci. J Exp Med. 1972;136(5):1258-71. Epub 1972/11/01. doi:  
891 10.1084/jem.136.5.1258. PubMed PMID: 4628335; PubMed Central PMCID:  
892 PMCPMC2139312.
- 893 81. Warner DM, Shafer WM, Jerse AE. Clinically relevant mutations that cause  
894 derepression of the *Neisseria gonorrhoeae* MtrC-MtrD-MtrE efflux pump system  
895 confer different levels of antimicrobial resistance and *in vivo* fitness. Mol Microbiol.  
896 2008;70(2):462-78. doi: 10.1111/j.1365-2958.2008.06424.x. PubMed PMID:  
897 18761689; PubMed Central PMCID: PMC2602950.
- 898 82. Mickelsen PA, Sparling PF. Ability of *Neisseria gonorrhoeae*, *Neisseria*  
899 *meningitidis*, and commensal *Neisseria* species to obtain iron from transferrin and  
900 iron compounds. Infect Immun. 1981;33(2):555-64. Epub 1981/08/01. PubMed  
901 PMID: 6792081; PubMed Central PMCID: PMCPMC350736.
- 902 83. Ohnishi M, Saika T, Hoshina S, Iwasaku K, Nakayama S, Watanabe H, et al.  
903 Ceftriaxone-resistant *Neisseria gonorrhoeae*, Japan. Emerg Infect Dis.  
904 2011;17(1):148-9. Epub 2011/01/05. doi: 10.3201/eid1701.100397. PubMed PMID:  
905 21192886; PubMed Central PMCID: PMCPMC3204624.
- 906 84. Unemo M, Golparian D, Nicholas R, Ohnishi M, Gallay A, Sednaoui P. High-level  
907 cefixime- and ceftriaxone-resistant *Neisseria gonorrhoeae* in France: novel *penA*  
908 mosaic allele in a successful international clone causes treatment failure.  
909 Antimicrob Agents Chemother. 2012;56(3):1273-80. doi: 10.1128/AAC.05760-11.  
910 PubMed PMID: 22155830; PubMed Central PMCID: PMC3294892.



- 911 85. McKnew DL, Lynn F, Zenilman JM, Bash MC. Porin variation among clinical  
912 isolates of *Neisseria gonorrhoeae* over a 10-year period, as determined by *por*  
913 variable region typing. J Infect Dis. 2003;187(8):1213-22. Epub 2003/04/16. doi:  
914 10.1086/374563. PubMed PMID: 12696000.
- 915 86. Sanchez JL, Agan BK, Tsai AY, Macalino GE, Wurapa E, Mbuchi M, et al.  
916 Expanded sexually transmitted infection surveillance efforts in the United States  
917 military: a time for action. Mil Med. 2013;178(12):1271-80. Epub 2013/12/07. doi:  
918 10.7205/MILMED-D-13-00137. PubMed PMID: 24306007.
- 919 87. Samo M, Choudhary NR, Riebe KJ, Shterev I, Staats HF, Sempowski GD, et al.  
920 Immunization with the *Haemophilus ducreyi* trimeric autotransporter adhesin DsrA  
921 with alum, CpG or Imiquimod generates a persistent humoral immune response  
922 that recognizes the bacterial surface. Vaccine. 2016;34(9):1193-200. Epub  
923 2016/01/27. doi: 10.1016/j.vaccine.2016.01.024. PubMed PMID: 26812077;  
924 PubMed Central PMCID: PMC6278816.
- 925 88. Davis MR, Jr., Goldberg JB. Purification and visualization of lipopolysaccharide  
926 from gram-negative bacteria by hot aqueous-phenol extraction. J Vis Exp.  
927 2012;(63). Epub 2012/06/13. doi: 10.3791/3916. PubMed PMID: 22688346;  
928 PubMed Central PMCID: PMC3466933.
- 929 89. Garvin LE, Bash MC, Keys C, Warner DM, Ram S, Shafer WM, et al. Phenotypic  
930 and genotypic analyses of *Neisseria gonorrhoeae* isolates that express frequently  
931 recovered PorB PIA variable region types suggest that certain P1a porin sequences  
932 confer a selective advantage for urogenital tract infection. Infect Immun.

933 2008;76(8):3700-9. Epub 2008/06/11. doi: 10.1128/IAI.00265-08. PubMed PMID:  
934 18541655; PubMed Central PMCID: PMCPMC2493220.

935 90. Connolly K, Jerse AE. 4CMenB *in vivo* efficacy data. Open Science Framework.  
936 2020. DOI 10.17605/OSF.IO/QU4VM

937 91. Shafer WM, Datta A, Kolli VS, Rahman MM, Balthazar JT, Martin LE, et al. Phase  
938 variable changes in genes *lgtA* and *lgtC* within the *lgtABCDE* operon of *Neisseria*  
939 *gonorrhoeae* can modulate gonococcal susceptibility to normal human serum. J  
940 Endotoxin Res. 2002;8(1):47-58. Epub 2002/05/01. PubMed PMID: 11981445.

941

## 942 **Figure captions**

### 943 **Fig 1. Serum and vaginal antibody titers against F62 OMVs from 4CMenB-immunized mice.**

944 Groups of 25 BALB/c mice were immunized three times, three weeks apart with 250  $\mu$ l or 4CMenB  
945 by the IP or SC routes or with PBS or Alum (IP route). Serum and vaginal antibody titers on day  
946 31 and day 52 (ten days after the 2<sup>nd</sup> and 3<sup>rd</sup> immunization, respectively) against F62 OMVs were  
947 measured by ELISA. Shown are serum **(A)** total Ig, **(B)** IgG1, **(C)** IgG2a, **(D)** IgA and **(E)**  
948 IgG1/IgG2a ratios for on days 31 and 52 (left column). Vaginal **(F)** total Ig, **(G)** IgG1, **(H)** IgG2a  
949 and **(I)** IgA on day 31 are shown in the right column. No difference was found in any sample or Ig  
950 tested between control animals receiving PBS and those receiving alum only. \*,  $p < 0.05$ ; \*\*,   
951  $p < 0.01$ ; \*\*\*,  $p < 0.0001$ . Results from the repeat experiment were similar.

952

### 953 **Fig 2. 4CMenB has *in vivo* efficacy against *Ng*.** Mice were immunized three weeks apart with

954 250- $\mu$ L doses of 4CMenB by the IP (blue) or SC (red) route or with PBS (black) or alum (purple)  
955 by the IP route and challenged with *Ng* strain F62 three weeks after the final immunization. Shown  
956 are the combined data from two independent trials (total  $n = 38-41$  mice/group). **(A)** Percentage  
957 of culture-positive mice over time; **(B)** Average CFU per ml of a single vaginal swab suspension;  
958 **(C)** total bioburden over 7 days expressed as area under the curve; **(D)** Percentage of mice that  
959 cleared infection by day 7 post-challenge. \*,  $p < 0.05$ ; \*\*,  $p < 0.01$ ; \*\*\*,  $p < 0.0001$ .

960

### 961 **Fig 3. Antisera from 4CMenB-immunized mice is bactericidal against a serum-sensitive**

962 **and a serum-resistant *Ng* strain.** Serial dilutions of pooled serum from mice vaccinated with  
963 250  $\mu$ l of 4CMenB (blue lines) or Alum alone (black lines) by the IP route were incubated with  $10^4$   
964 CFU of the challenge strain F62 or strain FA1090 in microtiter plates as described in the Materials  
965 and Methods. After 5 min, NHS or heat-inactivated (HI)-NHS (final concentration, 10%) was  
966 added. After 45 min incubation at 37°C, the number of viable *Ng* in each well was determined by

967 duplicate culture on GC agar. Data are expressed as the number of CFU from wells incubated  
968 with test serum divided by the number recovered from wells containing PBS instead of test serum,  
969 X times 100. Solid lines indicate NHS was used as the complement source; dotted lines represent  
970 data from wells tested in parallel with HI-NHS. The dotted line at 50% survival was drawn to  
971 identify the bactericidal<sub>50</sub> titers.

972

973 **Fig 4. Serum and vaginal antibodies from 4CMenB-immunized mice recognize *Ng* outer**  
974 **membrane proteins by western immunoblot. (A)** Pooled antisera from mice immunized with  
975 250  $\mu$ L of 4CMenB by the IP (250IP, upper panels) or SC (250SC, lower panels) route were tested  
976 against OMVs (app. 20  $\mu$ g per lane) from 7 different *Ng* strains fractionated on 4-20% Tris-glycine  
977 gels by western blot (1:10,000 dilution of primary antisera) followed by secondary anti-mouse IgG-  
978 HRP. A boosting effect is observed when comparing the band intensities for serum collected after  
979 2 and 3 immunizations. **(B)** Pooled vaginal washes from immunized or control mice collected after  
980 the third immunization tested against OMVs from the F62 challenge strain by western blot (1:100  
981 dilution), followed by secondary anti-mouse IgG-HRP or anti-mouse IgA-HRP. Pooled vaginal  
982 washes were from mice given: (1) SC250; (2) IP250; (3) PBS; (4) Alum only. (5) Results using  
983 250IP mouse serum (1: 10,000) for comparison. The band recognition pattern was similar for blots  
984 incubated with serum (lanes 5) or vaginal washes (lanes 1-4), and vaginal washes from IP-  
985 immunized mice were more strongly reactive than from SC-immunized mice. All lanes were  
986 equally loaded, as determined by Ponceau S staining. Shown are representative results from at  
987 least 2 separate experiments with identical results.

988

989 **Fig 5. 4CMenB antiserum recognizes *Ng* LOS in a minority of strains.** Proteinase K-treated  
990 bacterial extracts from 4 laboratory strains and 13 clinical isolates were resolved on 16% Tricine  
991 gels and stained with (A) silver stain (top panel) or (B) Emerald green (top panels), or  
992 electroblotted and probed with the following: (A) Mabs 3F11, 4C4 and 2C7, which recognize *Ng*

993 LOS epitopes (bottom panels). Note that FA19 1986 is a variant of FA19 (panel B) that has a  
994 phase-off *lgtA* gene that results in truncation of the LOS to a single 3.6 kDa species [91]. (B)  
995 Pooled IP250 4CMenB antisera (bottom panels). The doublets in LGB-24 and NMCS D 3277 and  
996 single LOS species in MS11 and NMCS D 6364 that were recognized by the antiserum are distinct  
997 from the LOS species identified by the Mabs shown in Panel A. (C) Emerald green-stained (upper  
998 panel) LOS from *Ng* strain H041 and LGB-24 (positive control) used to inoculate mice (Inoc) and  
999 from vaginal cultures collected on days 2 and 5 of infection. No change in the LOS species or  
1000 4CMenB reactivity was observed during infection by these strains.

1001  
1002 **Fig 6. PilQ, MtrE, porin and OpA are recognized by 4CMenB antisera.** OMV (app. 20  $\mu$ g) from  
1003 6 *Ng* strains (Table 2) were subjected to SDS-PAGE on a 4-20% Tris-glycine gel and (A) stained  
1004 with sypro ruby or (B) transferred to PVDF for western blot with the 250IP antiserum. The stained  
1005 gel was aligned with the Western blot, and corresponding bands were digested and analyzed by  
1006 mass spectrometry. The numbers indicated with arrows on each panel correspond to the same  
1007 numbers on the Western blots except for bands 5 and 6, which were excised from a different gel  
1008 but are indicated on the western based on the banding patterns. Proteins identified are described  
1009 in Table 1. Among the proteins identified, known surface-exposed outer membrane proteins are:  
1010 (1) PilQ, (2) BamA, (4) MtrE, (5) PorB, and (6) Opa.

1011  
1012 **Fig 7. 4CMenB -induced antibodies bind PilQ and MtrE at the surface of viable *Ng* FA1090**  
1013 **and MS11 bacteria.** Immunoprecipitations were performed with wild-type strains FA1090 and  
1014 MS11 and their isogenic *pilQ* and *mtrE* mutants using antisera from mice immunized with 250  $\mu$ L  
1015 of 4CMenB via the IP route (250IP) or given alum only (negative control). Bacterial components  
1016 bound by 4CMenB-induced antisera were subjected to SDS-PAGE (non-denaturing conditions,  
1017 4-20% Tris-glycine) and Western blotting with 4CMenB 250IP antiserum. WCLs, total cellular  
1018 proteins; OMVs, outer membrane vesicles; *pilQ*<sup>-</sup>, FA1090 $\Delta$ *pilQ*; *mtrE*<sup>-</sup>, MS11 $\Delta$ *mtrE*. Data shown

1019 are representative of at least 2 separate experiments with identical results. The wide band around  
1020 200 kDa corresponds to the antibodies within the test antisera that are present in the antigen-  
1021 antibody complexes and pulled down with the protein A/G agarose.

1022

## 1023 **Supporting Information**

1024

1025 **S1 Fig. Pilot dose response immunization study with the 4CMenB vaccine.** Groups of 5  
1026 BALB/c mice were given 20, 100 or 250  $\mu$ l of the formulated vaccine on days 1 and 28 by the IP  
1027 or SC routes. (A, B) Serum IgG1 and IgG2a titers against the formulated 4CMenB vaccine 10  
1028 days after the second immunization. A dose response is shown for serum IgG1 in both IP- and  
1029 SC-immunized mice. (C) Serum reactivity against whole cell lysates of *Nm* strain MC58 and of 6  
1030 different *Ng* strains using anti-mouse IgG secondary antibody shows a similar dose response  
1031 based on differences band intensity. A nonparametric test, the Kruskal Wallis test with Dunn's  
1032 multiple comparison, was used to analyze ELISA data due to the low sample size. \*\*,  $p < 0.01$ .

1033

1034 **S2 Fig. 4CMenB significantly accelerated *Ng* clearance and reduced the *Ng* colonization**  
1035 **load in two independent experiments.** In each experiment, mice were immunized three weeks  
1036 apart with 250- $\mu$ l doses of 4CMenB by the IP (blue) or SC (red) route or given PBS (black) or  
1037 alum (purple) by the IP route ( $n = 25$  or  $20$  mice per group in experiments 1 and 2, respectively).  
1038 Three weeks after the final immunization, mice in the diestrus stage or anestrus were treated with  
1039  $17\beta$ -estradiol and antibiotics and challenged with *Ng* strain F62 as described in the Materials and  
1040 Methods. (A, B) Percentage of culture-positive mice over time and average CFU per ml of a single  
1041 vaginal swab suspension, respectively for experiment 1 ( $n = 20$ - $23$  mice/group); (C, D)  
1042 Percentage of culture-positive mice over time and average CFU per ml of a single vaginal swab  
1043 suspension, respectively for experiment 2 ( $n = 18$ - $19$  mice/group).

1044 \*, p < 0.05, \*\*p < 0.01, \*\*\* p < 0.0001.

1045

1046 **S3 Fig. A similar vaginal PMN influx occurred in all experimental groups.** Vaginal smears  
1047 collected on each culture day following bacterial challenge were stained with Hemacolor Stain  
1048 (Sigma), and the percent of PMNs among 100 vaginal cells was determined by cytological  
1049 differentiation using a light microscopy. An increase in the percentage of PMNs occurred between  
1050 days 4-7 as is characteristic of this model, with no statistical difference between the groups. The  
1051 median percent PMNs is shown for each time-point.

1052

1053 **S1 Table. Amino acid identity between proteins of *N. meningitidis* MC58 and *N.***  
1054 ***gonorrhoeae* FA1090**

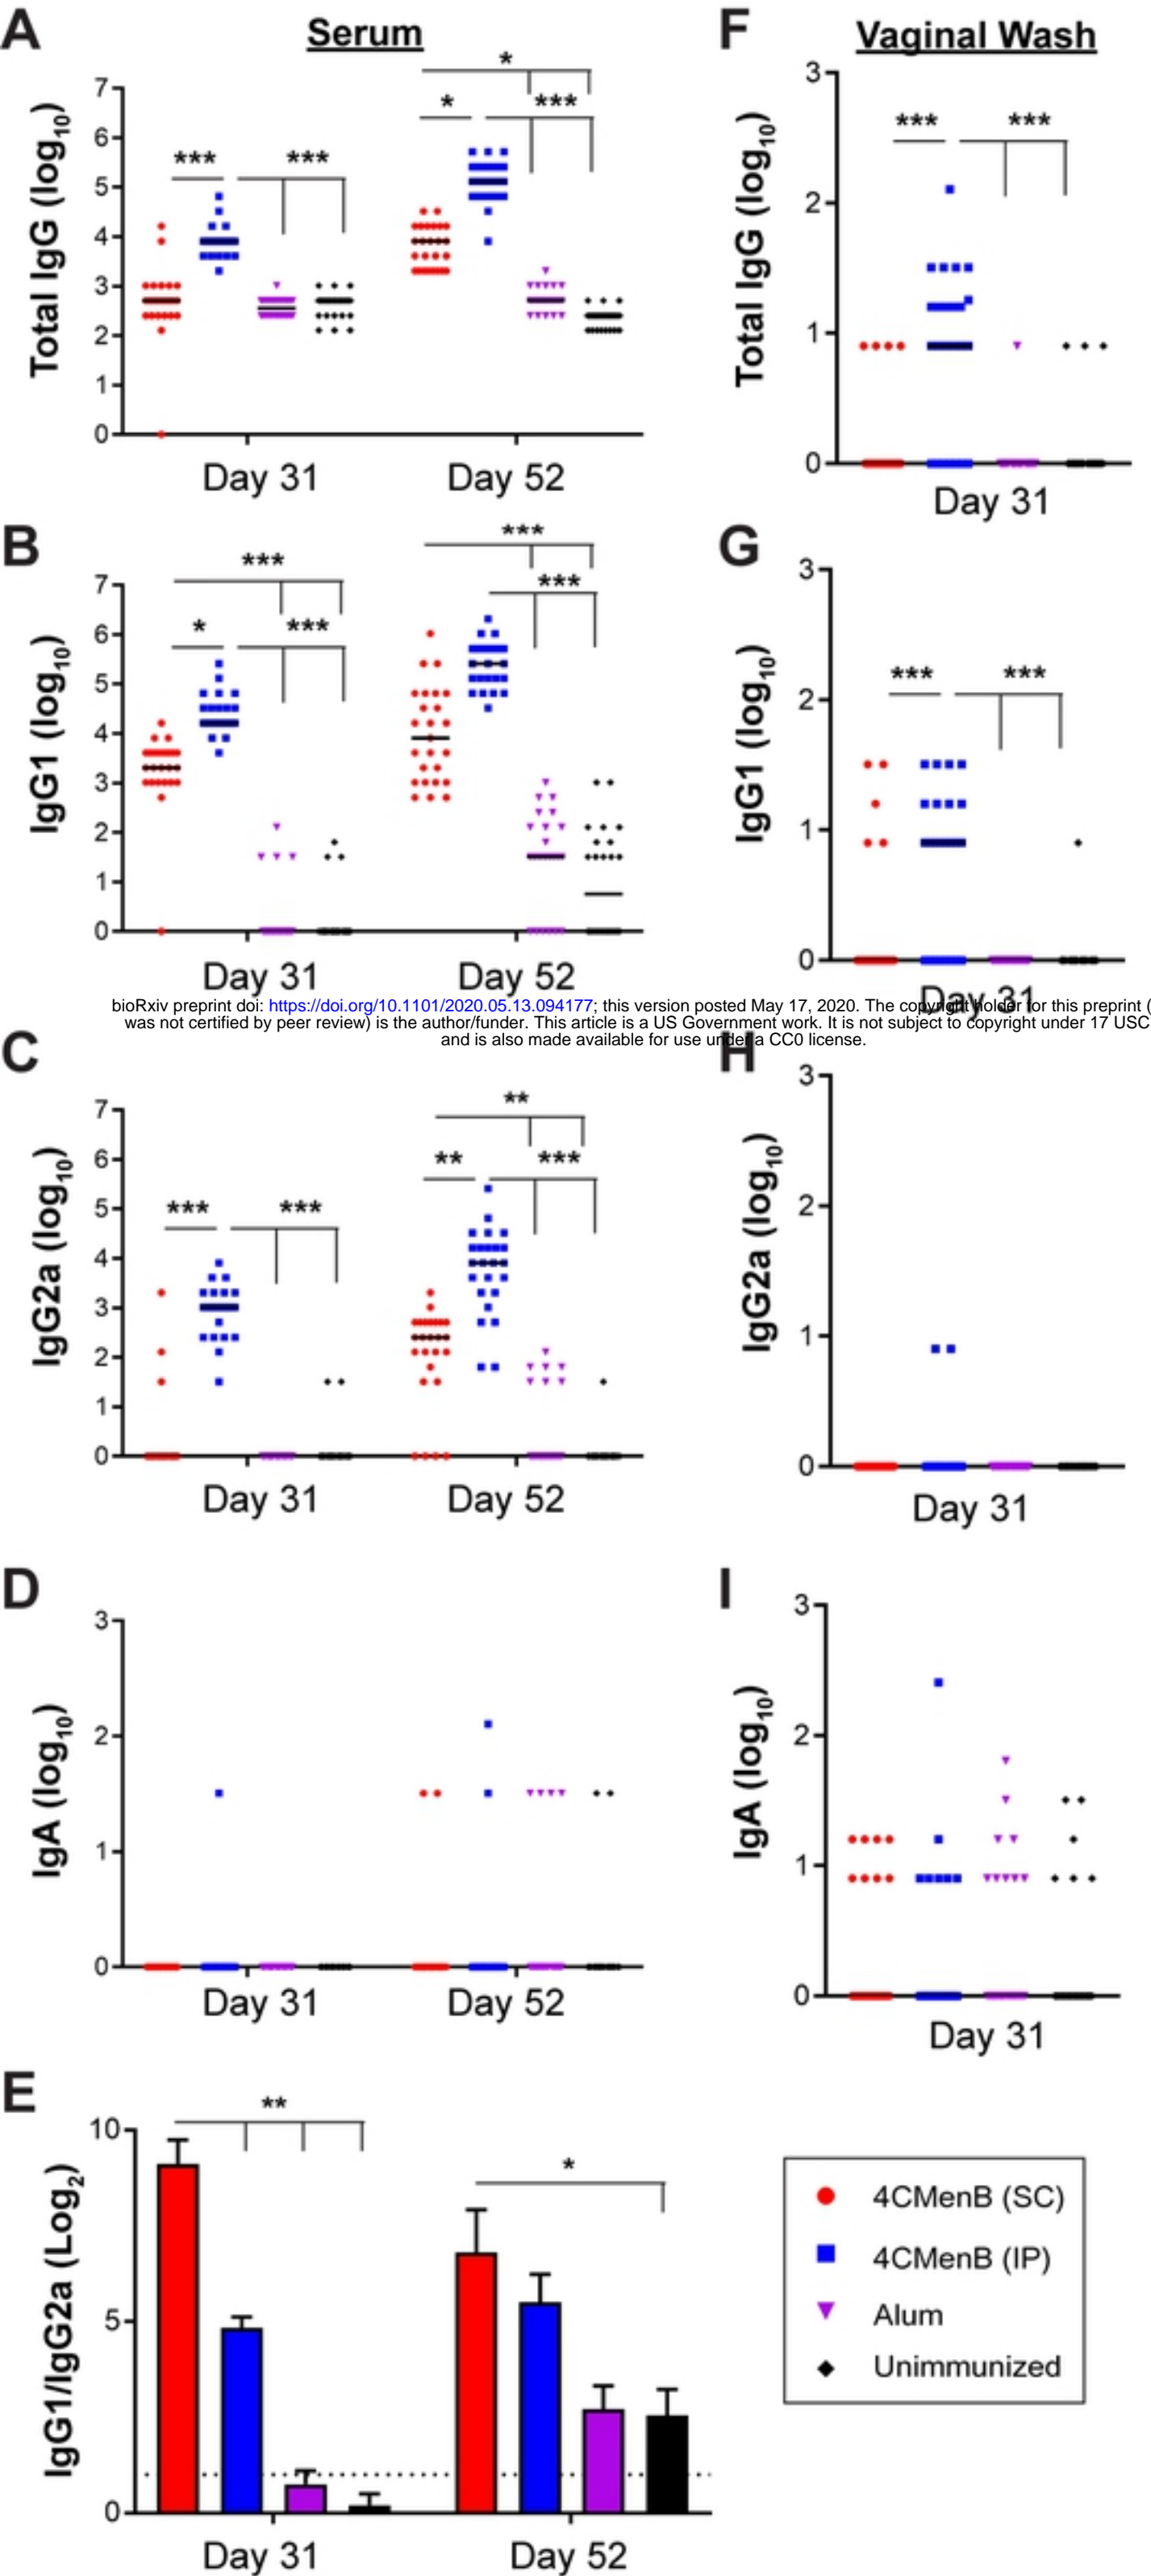

Figure 1

bioRxiv preprint doi: <https://doi.org/10.1101/2020.05.13.094177>; this version posted May 17, 2020. The copyright holder for this preprint (which was not certified by peer review) is the author/funder. This article is a US Government work. It is not subject to copyright under 17 USC 105 and is also made available for use under a CC0 license.



**A**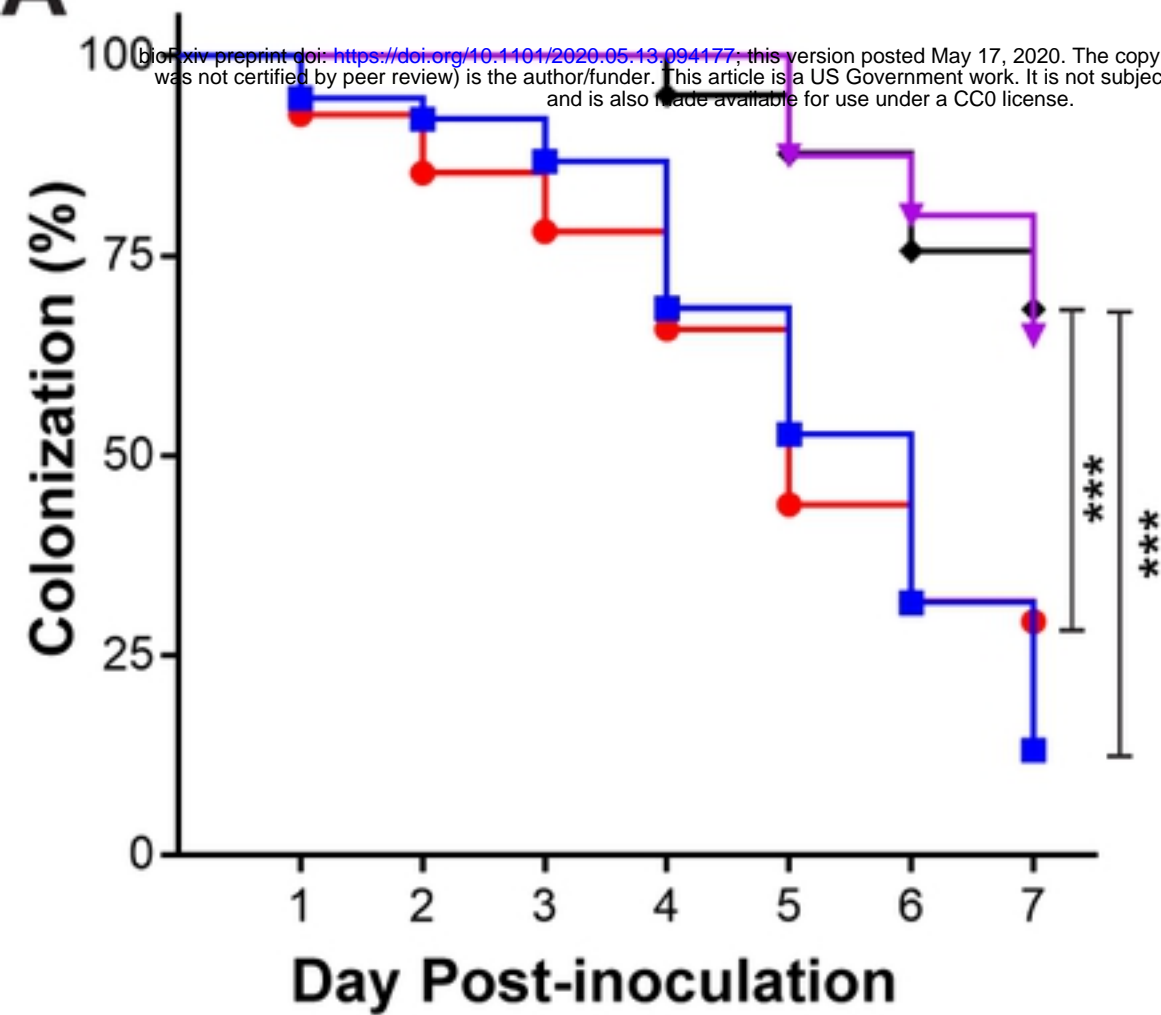**B**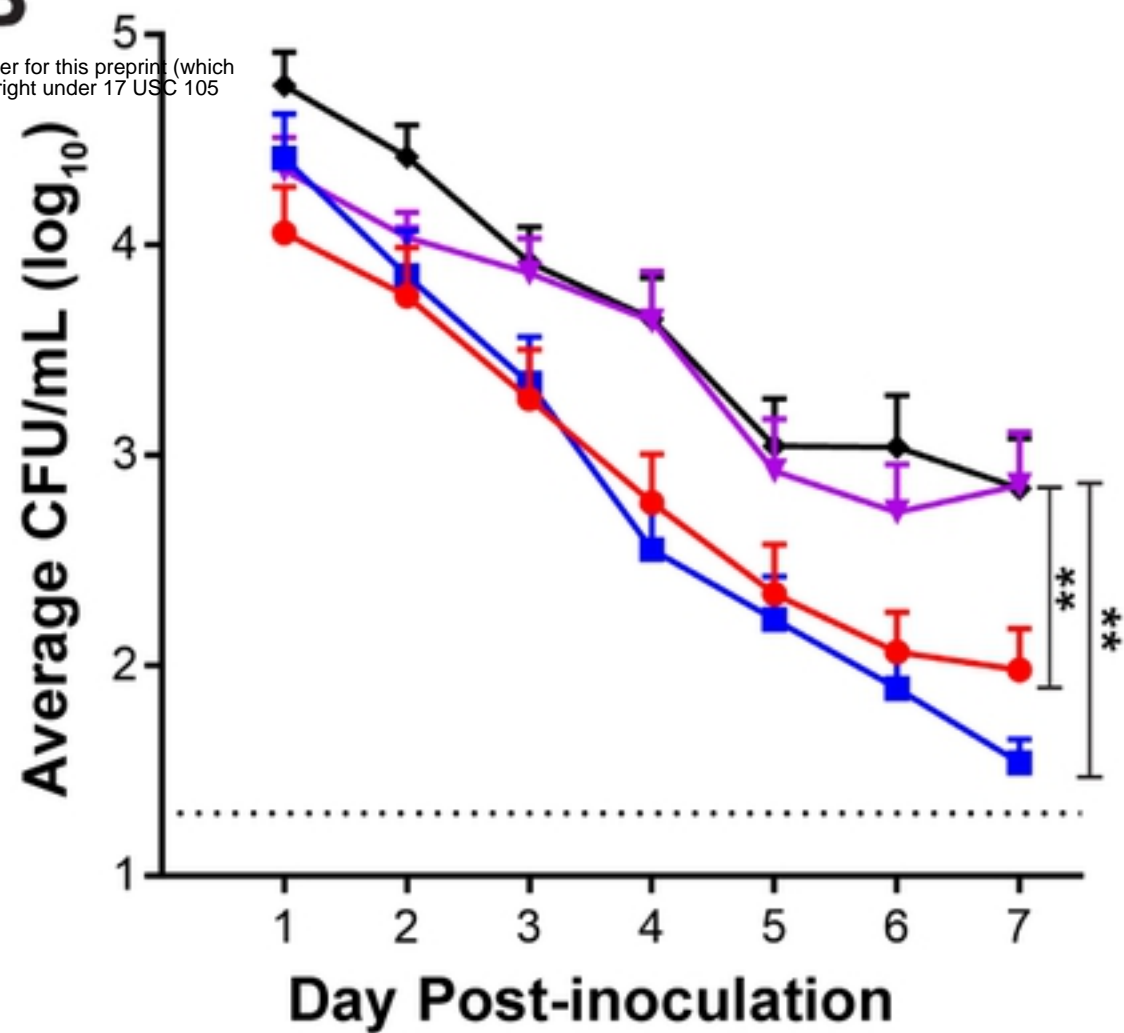**C**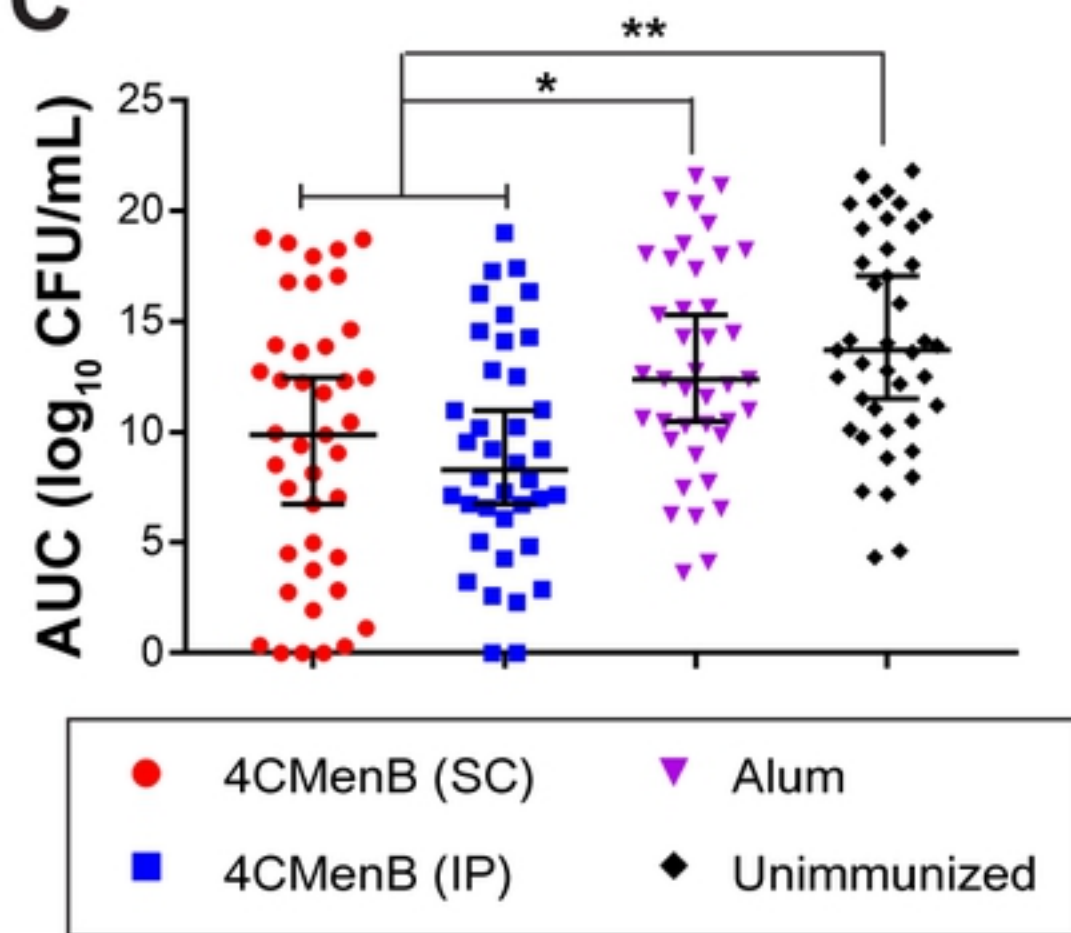**D**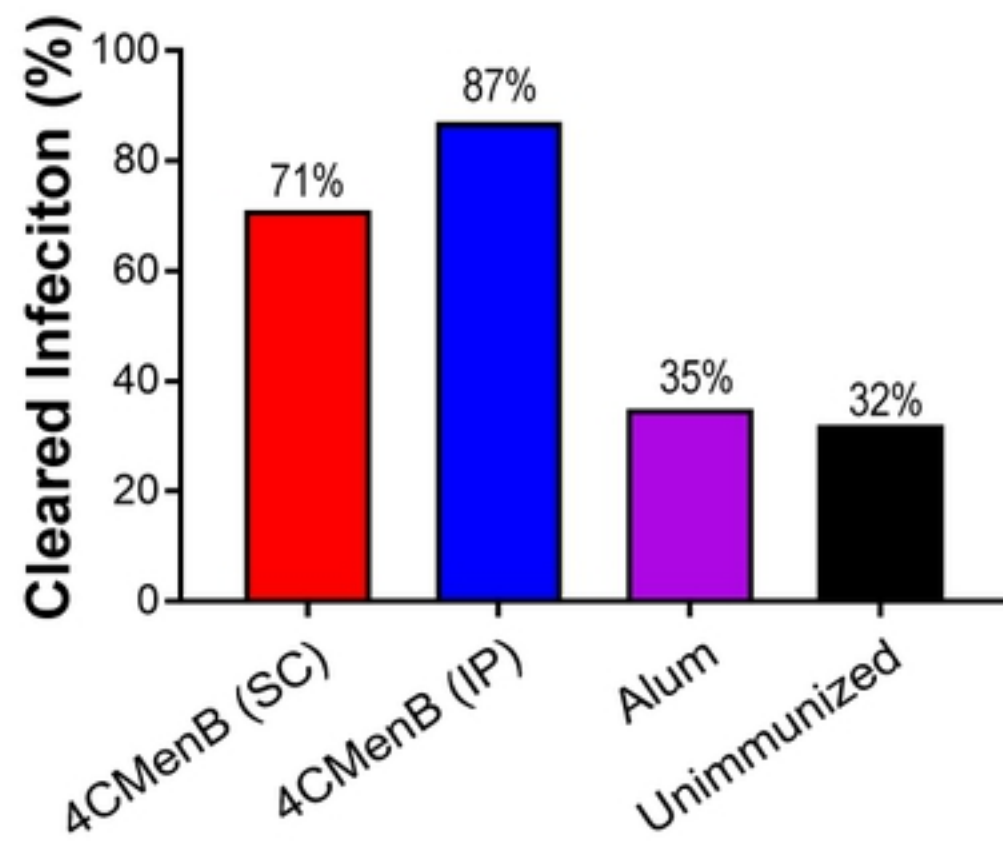

Figure 2

**A**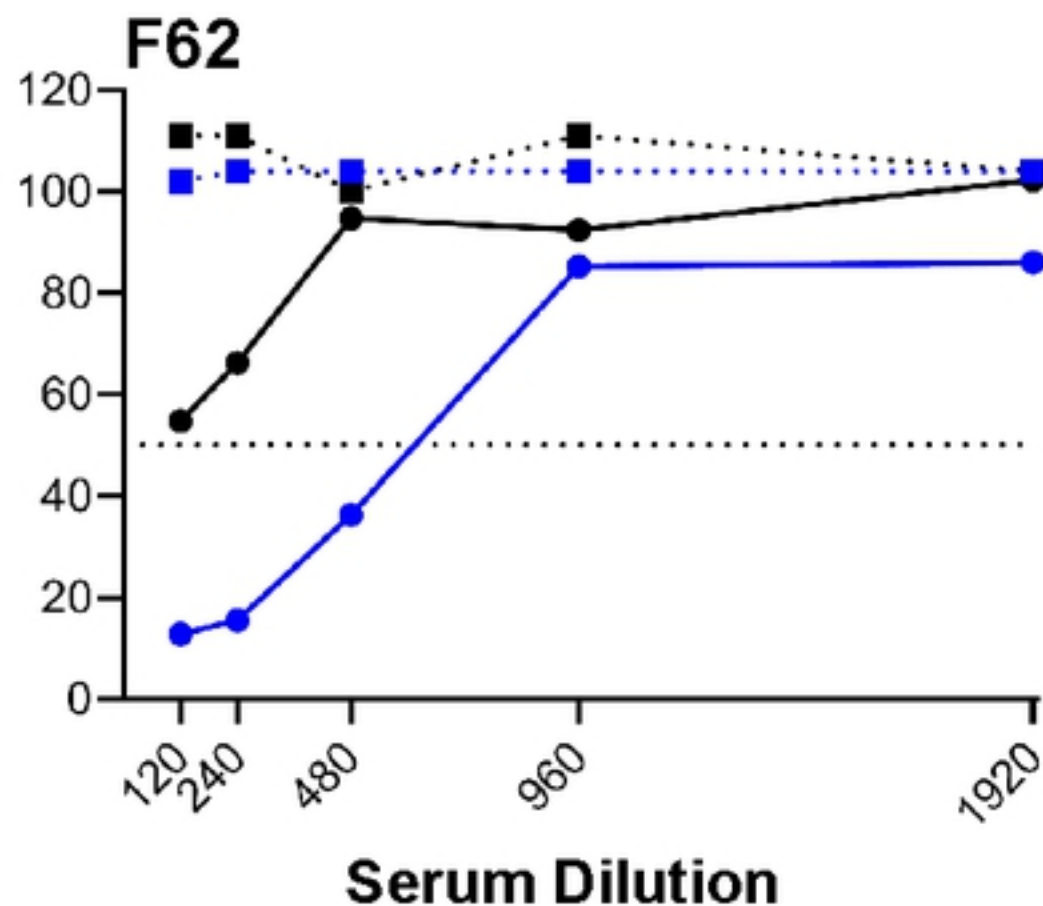**B**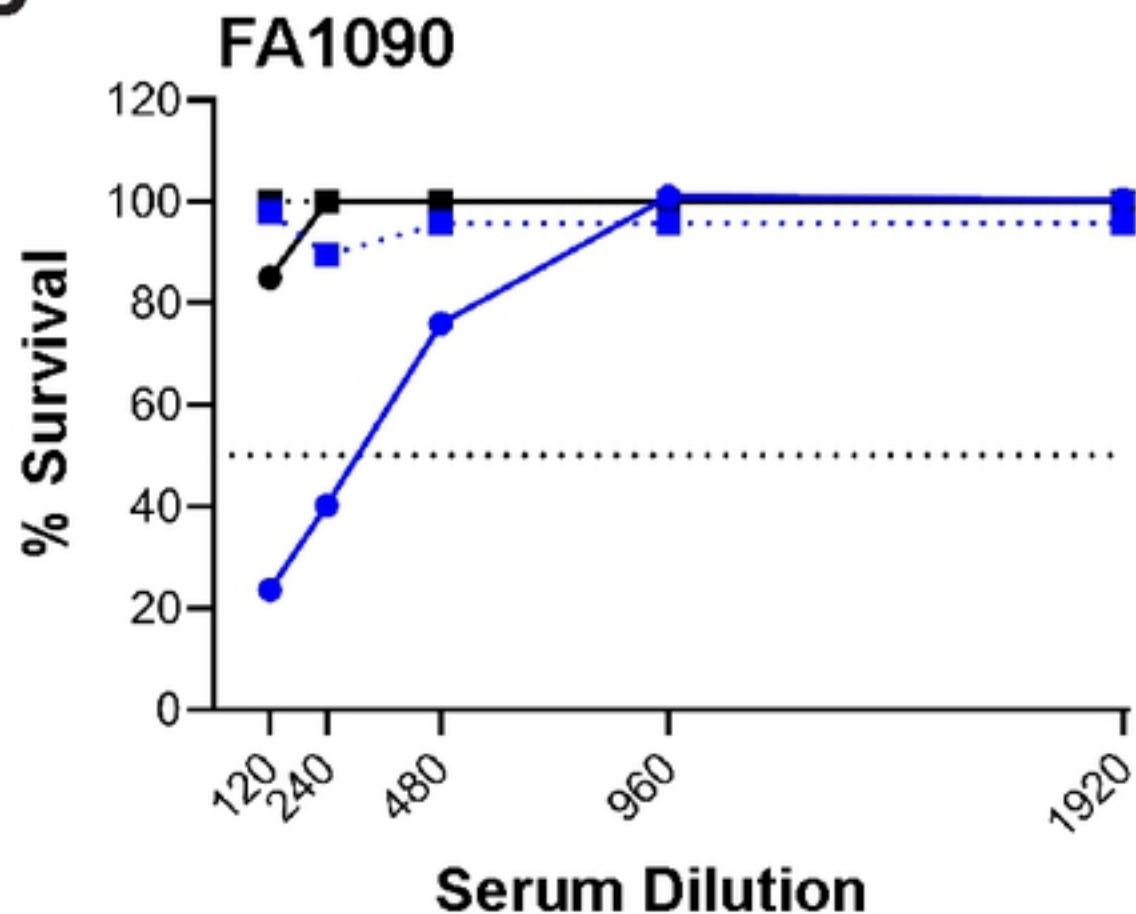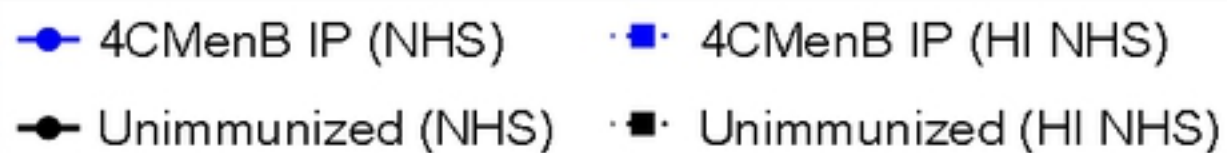

Figure 3

**A**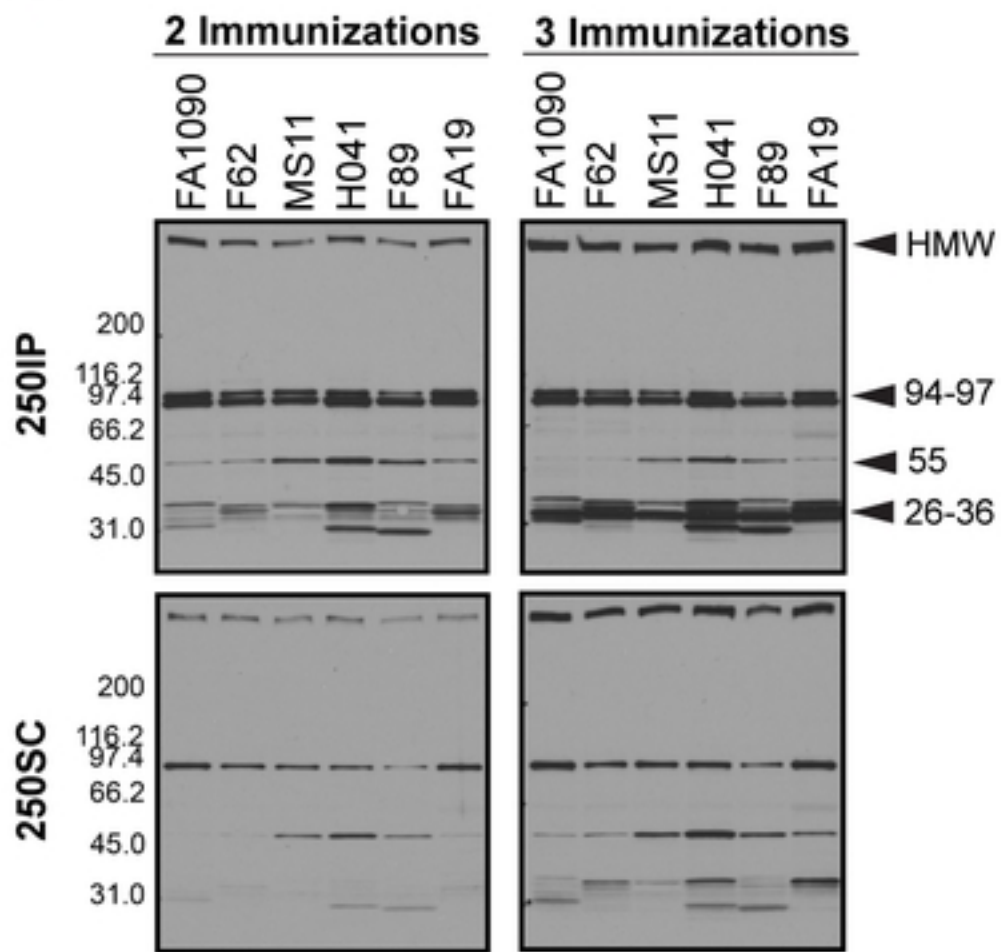**B**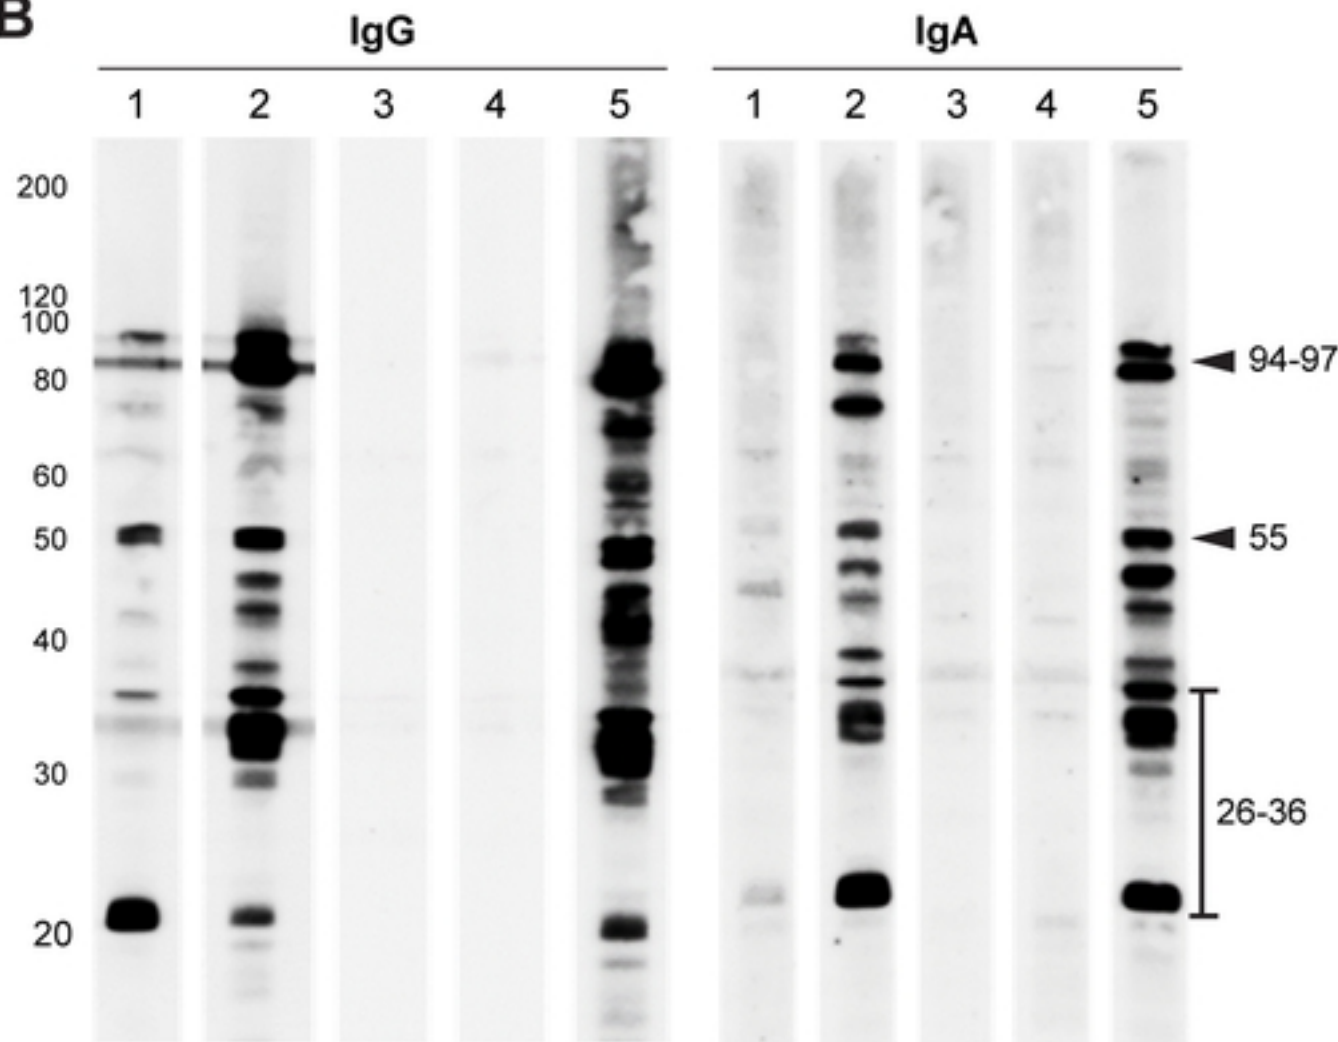

Figure 4

**A**

bioRxiv preprint doi: <https://doi.org/10.1101/2020.05.18.094177>; this version posted May 17, 2020. The copyright holder for this preprint (which was not certified by peer review) is the author/funder. This article is a US Government work. It is not subject to copyright under 17 USC 105 and is also made available for use under aCC0 license.

3F11

4C4

2C7

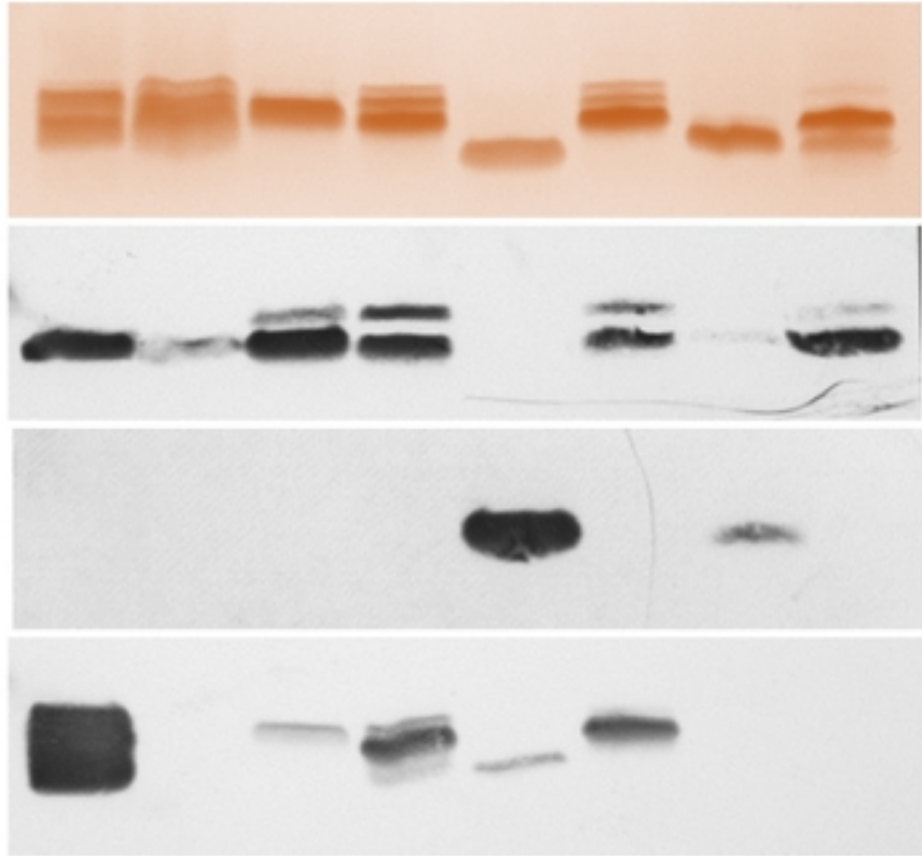**B** $\alpha$  4CMenB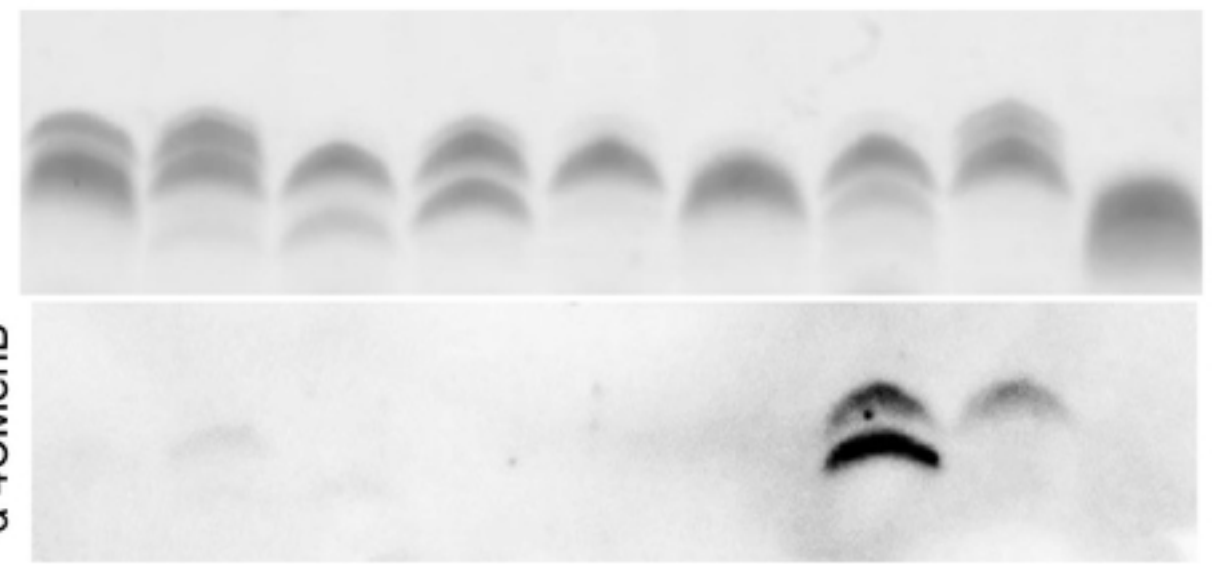**C**

H041

LGB-24

Inoc. D2 D5 D2 D5 Inoc. D2

 $\alpha$  4CMenB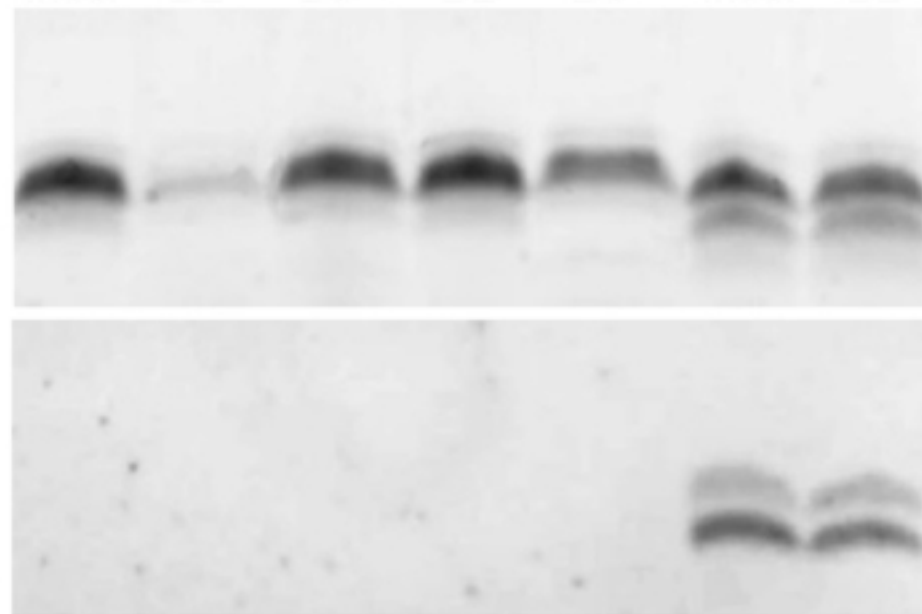 $\alpha$  4CMenB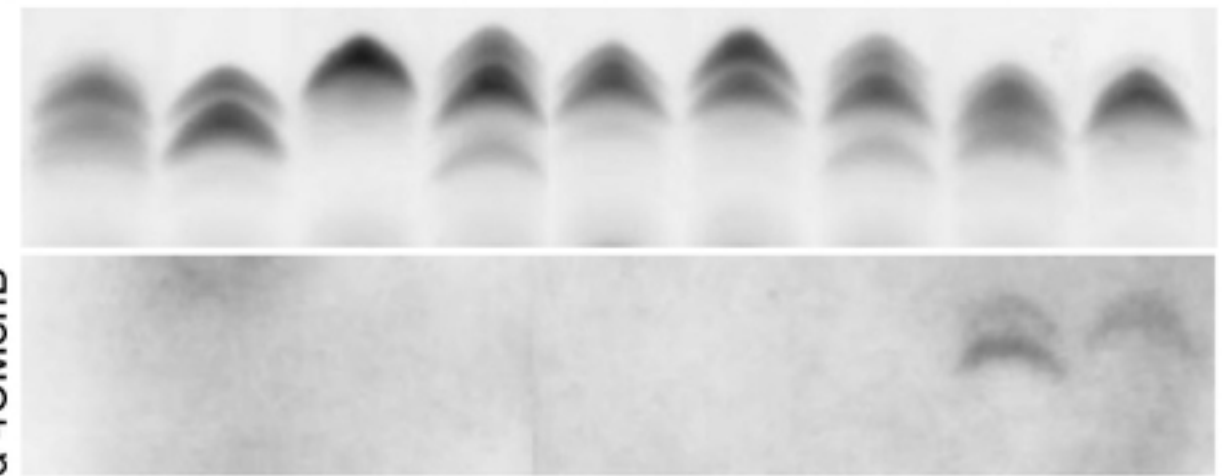

Figure 5

**A**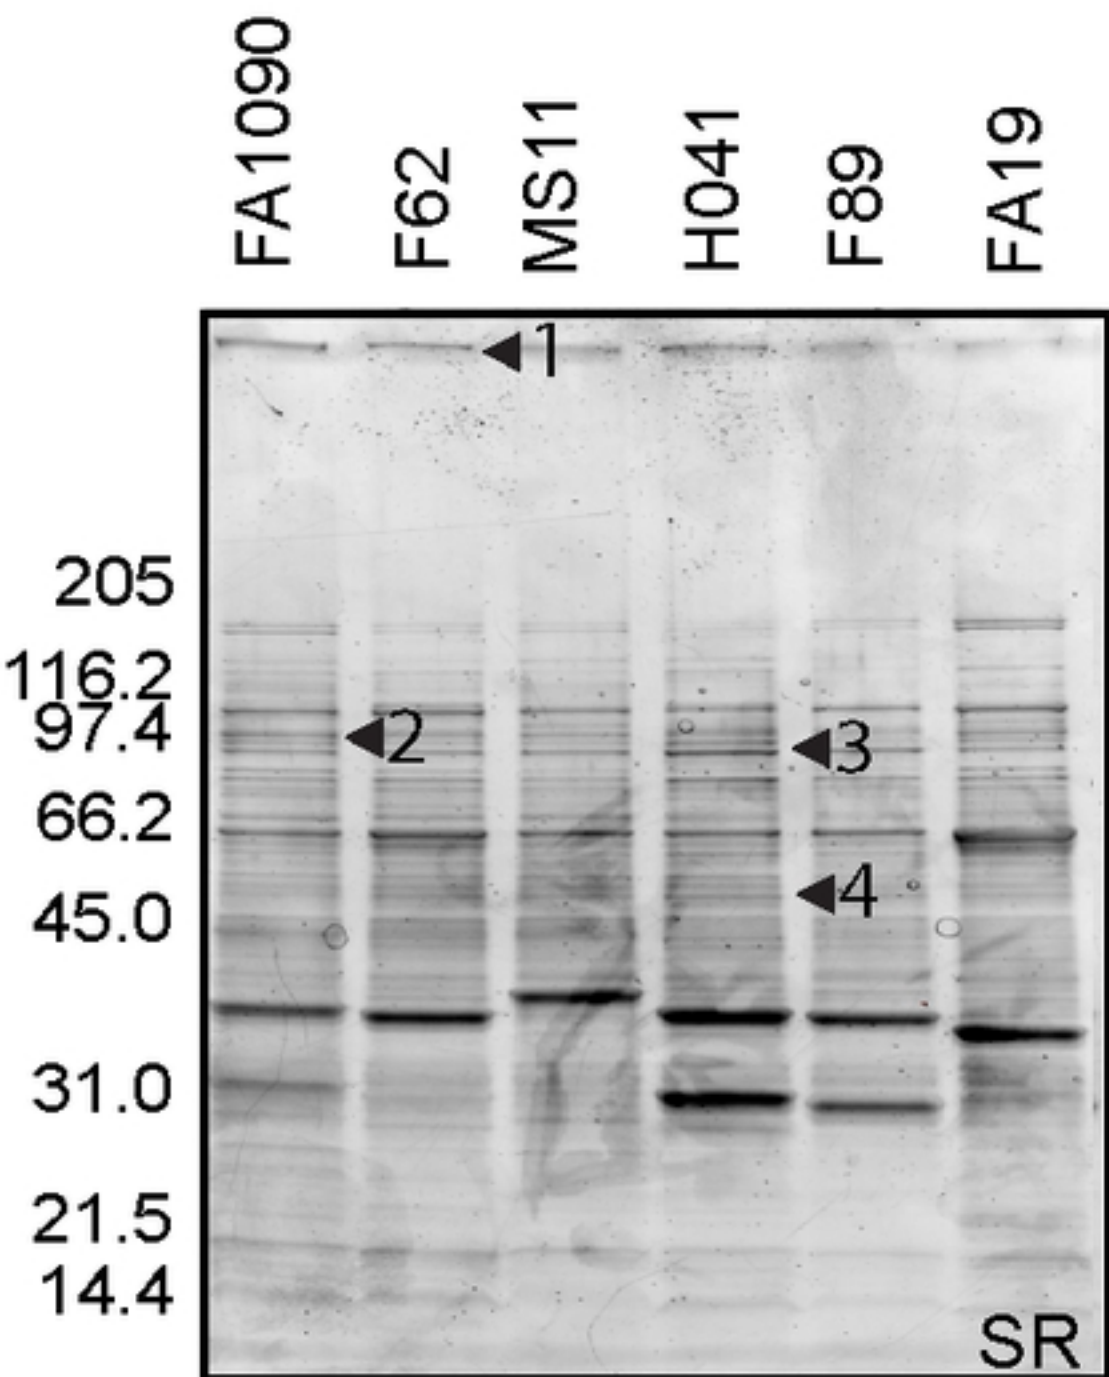**B**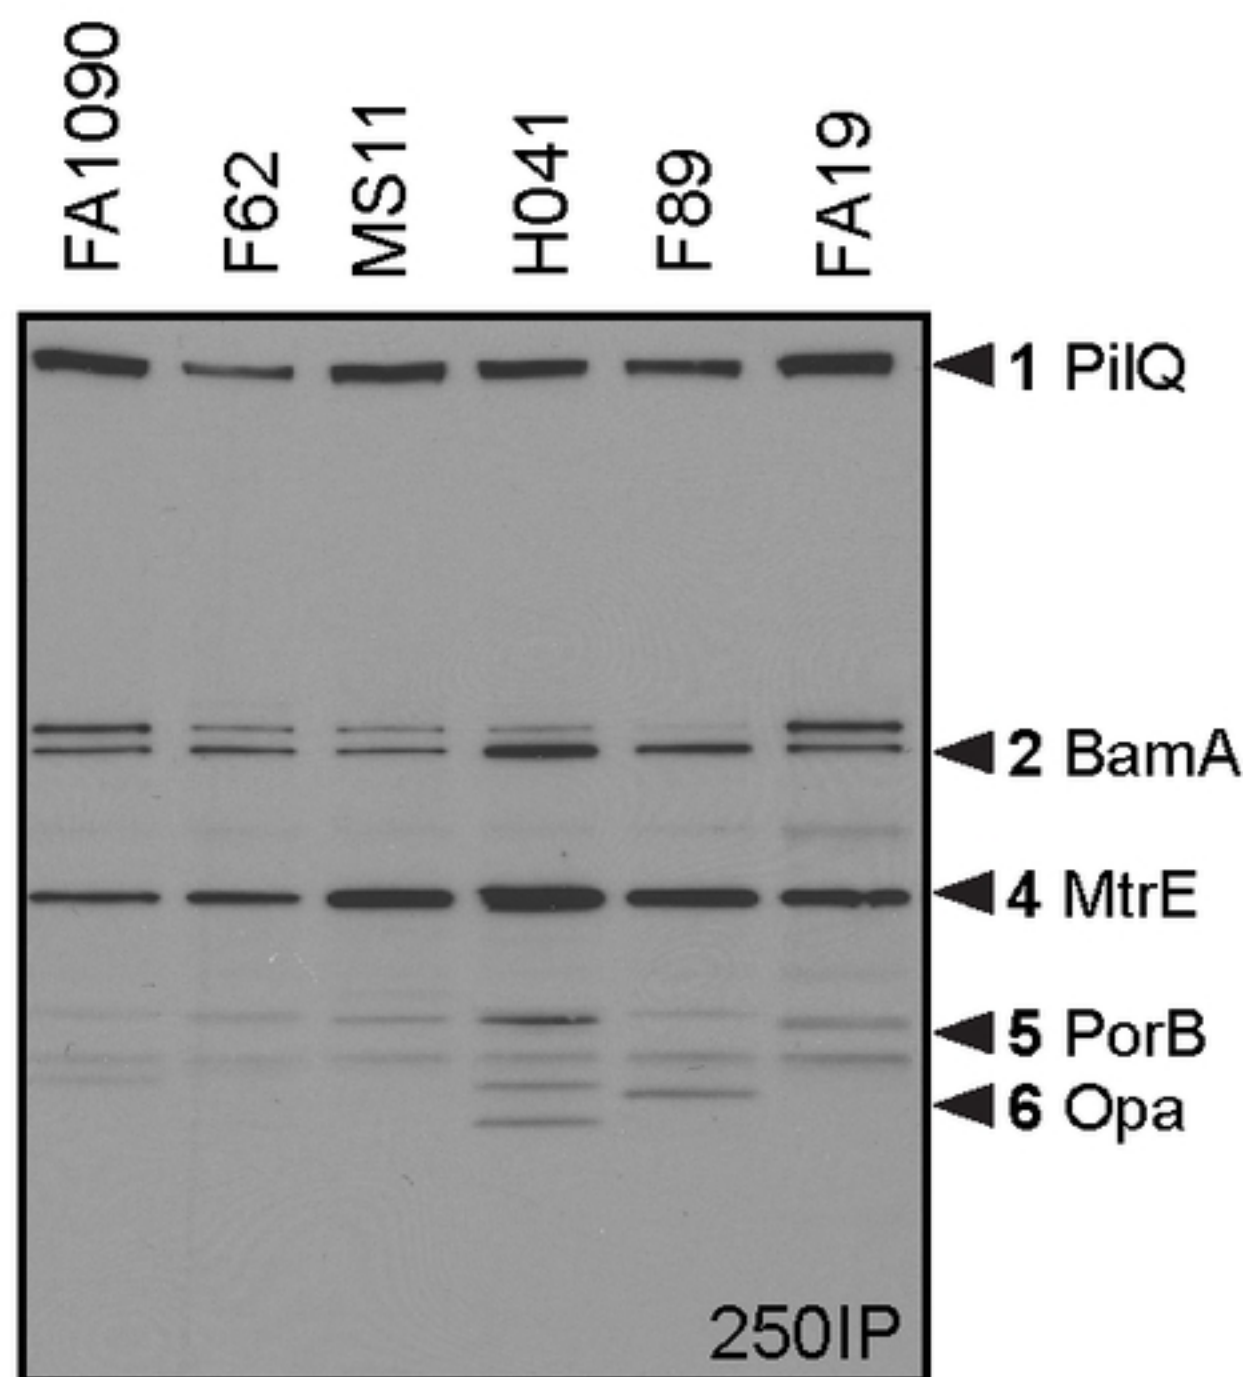

Figure 6

FA 1090

MS11

bioRxiv preprint doi: <https://doi.org/10.1101/2020.05.13.094177>; this version posted May 17, 2020. The copyright holder for this preprint (which was not certified by peer review) is the author/funder. This article is a US Government work. It is not subject to copyright under 17 USC 105 and is also made available for use under a CC0 license.

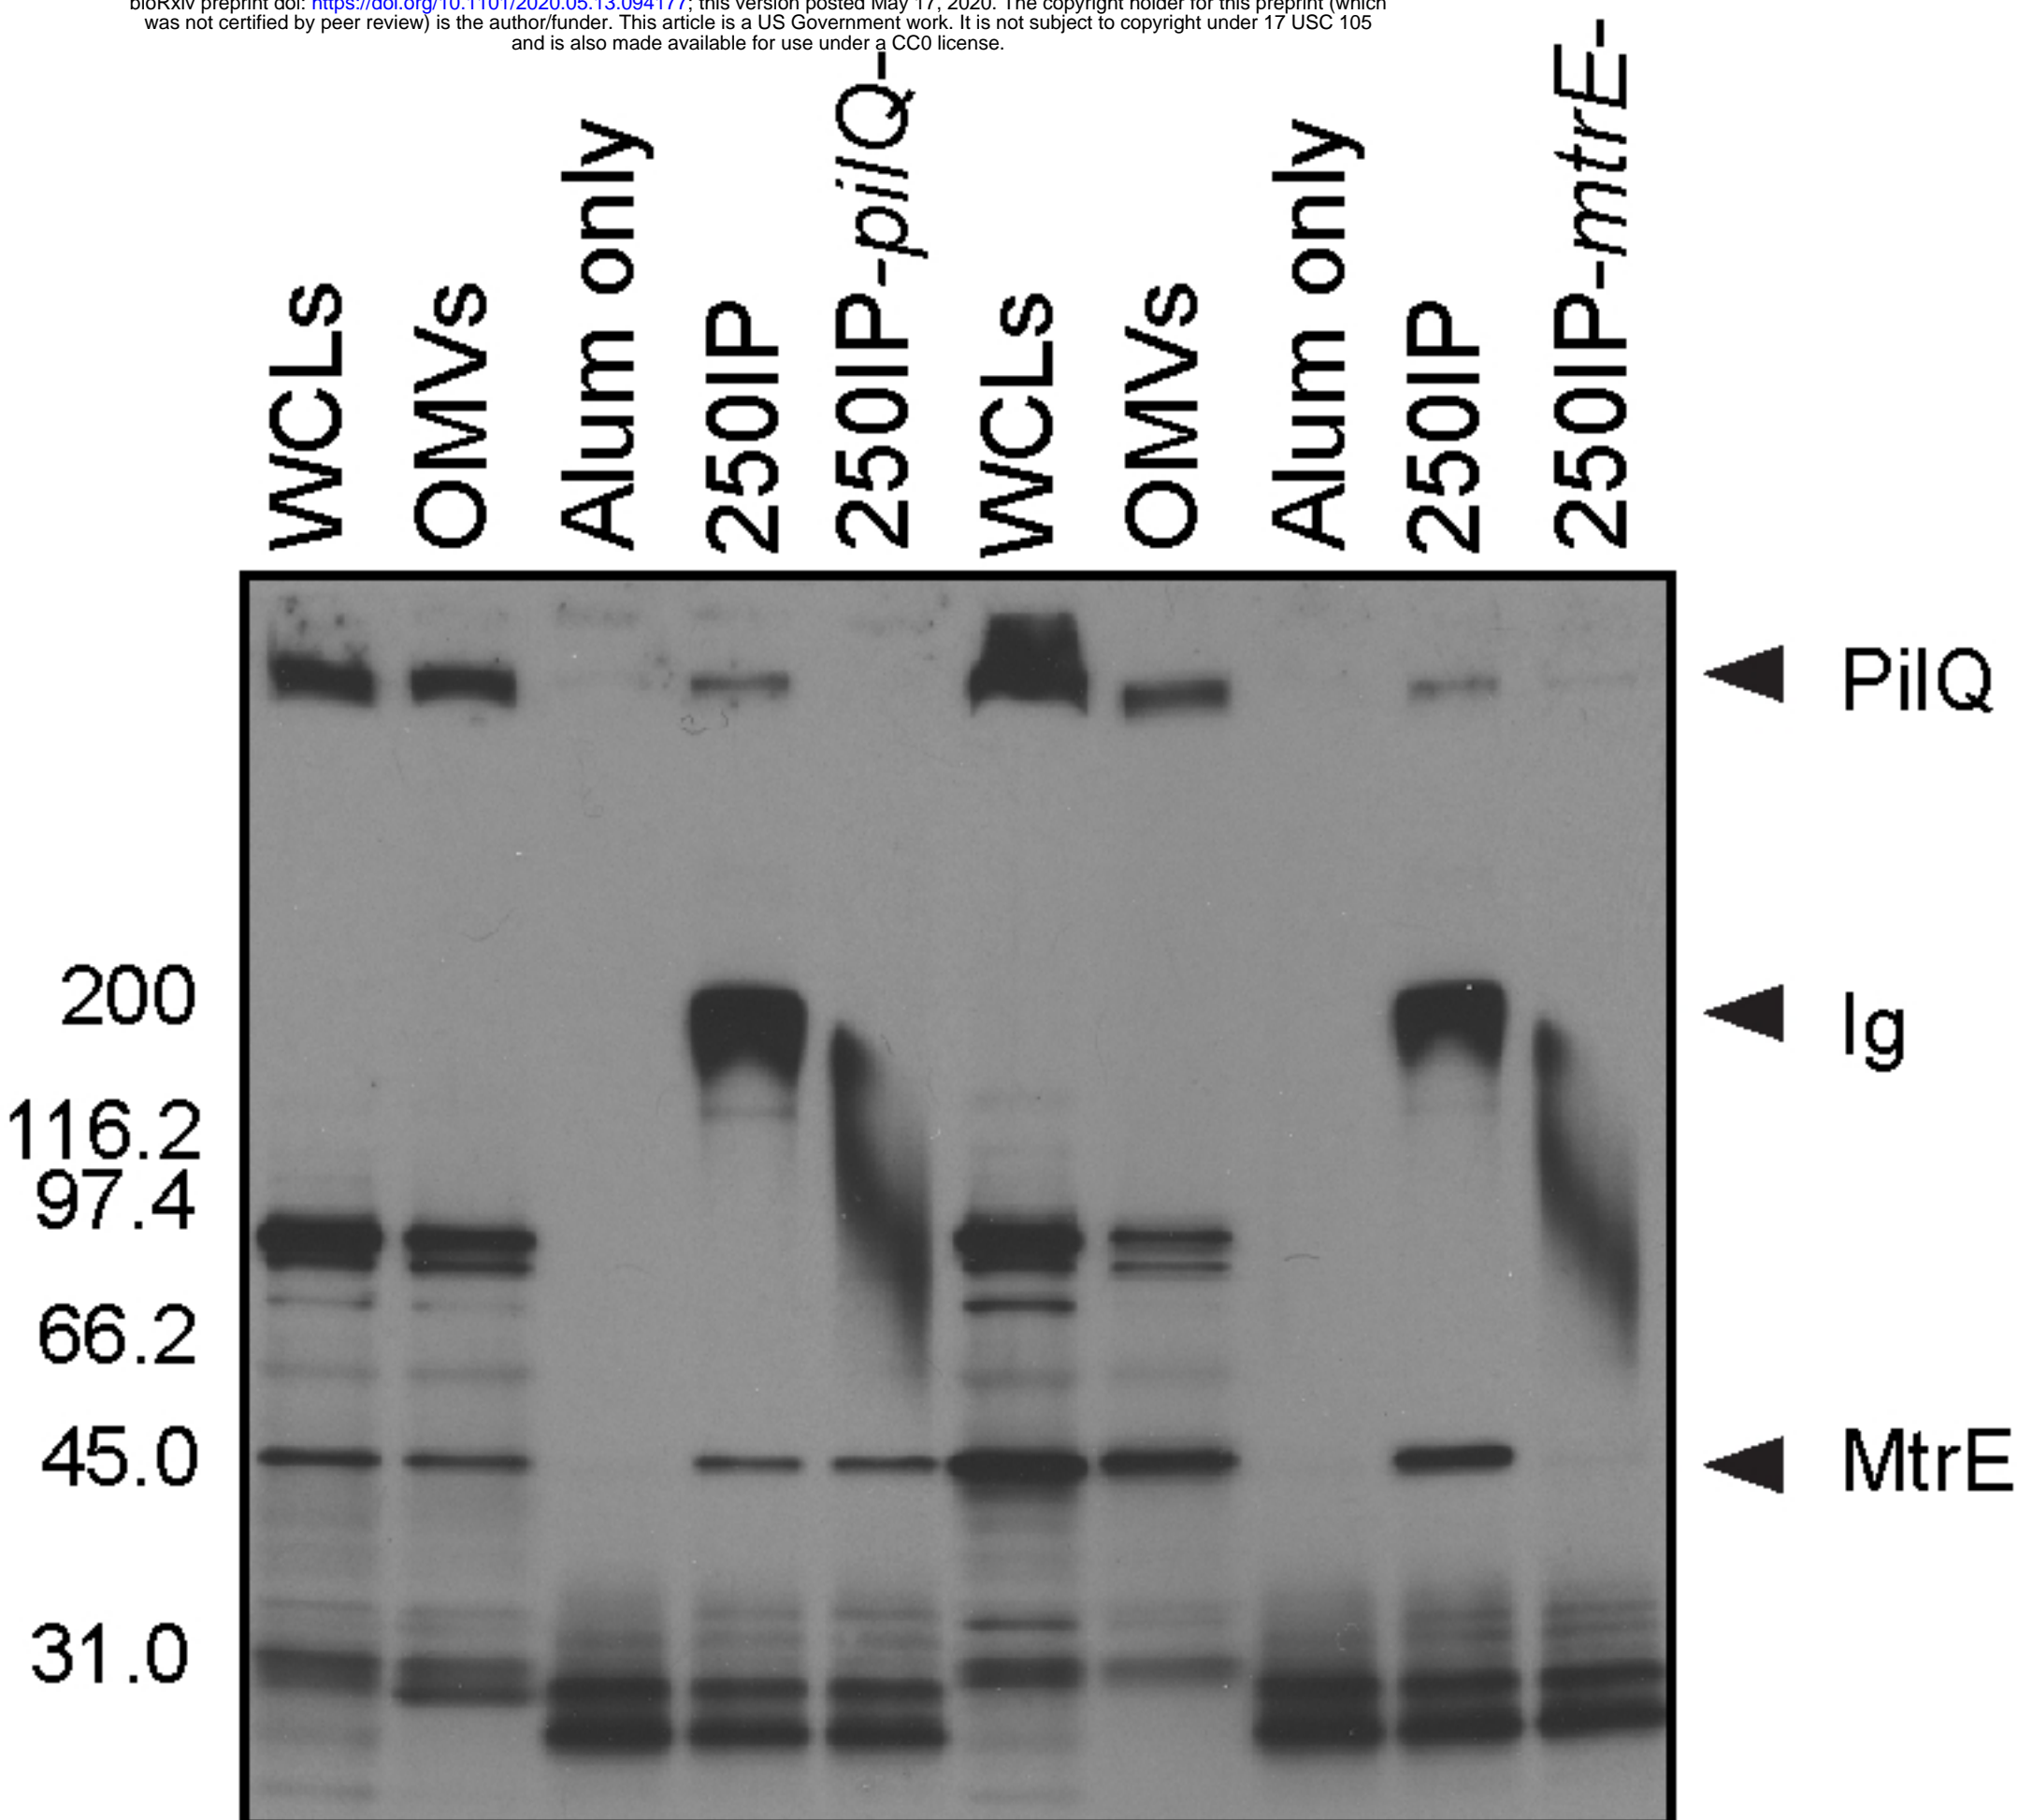

Figure 7
